# Supplementary material for: Dinuclear lanthanide molecular magnetic materials bridged by tetrazine derivatives containing N6 and N8 atom sites display slow magnetic relaxation behavior
Source: Royal Society of Chemistry journal article supplement (doi:10.1039/d4ce00748d), 2024-01-01
Supplement: d4ce00748d1.pdf [file d4ce00748d1.pdf]

## Supporting Information

Dinuclear Lanthanide Molecular Magnetic Material Bridged by Tetrazine Derivatives

Containing N6 and N8 Atom Sites Display Slow Magnetic Relaxation Behavior

Ji-Tun Chen,<sup>a</sup> Rui Guo,<sup>a</sup> Yi-Quan Zhang<sup>\*b</sup> and Wen-Bin Sun,<sup>\*a</sup>

- a. Key Laboratory of Functional Inorganic Material Chemistry Ministry of Education, School of Chemistry and Material Science Heilongjiang University, 74 Xuefu Road, Harbin 150080, P. R. China.

E-mail: wenbinsun@126.com

- b. Jiangsu Key Laboratory for NSLSCS, School of Physical Science and Technology, Nanjing Normal University, Nanjing 210023, P. R. China.

E-mail: zhangyiquan@njnu.edu.cn

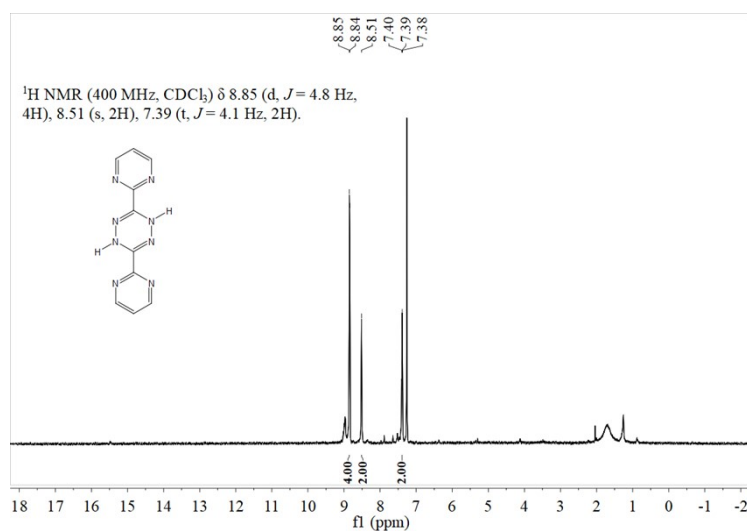

**Fig. S1.** <sup>1</sup>H NMR spectrum of H<sub>2</sub>bmtz.

**Table S1.** Crystallographic data for **1-3**.

| Complex                                     | <b>1</b>                                                                                                                      | <b>2</b>                                                                                      | <b>3</b>                                                                                       |
|---------------------------------------------|-------------------------------------------------------------------------------------------------------------------------------|-----------------------------------------------------------------------------------------------|------------------------------------------------------------------------------------------------|
| Empirical formula                           | C <sub>62</sub> H <sub>36</sub> Cl <sub>4</sub> Dy <sub>2</sub> F <sub>18</sub> N <sub>6</sub> O <sub>12</sub> S <sub>6</sub> | C <sub>29</sub> H <sub>16</sub> DyF <sub>9</sub> N <sub>4</sub> O <sub>6</sub> S <sub>3</sub> | C <sub>40</sub> H <sub>18</sub> Dy <sub>2</sub> F <sub>36</sub> N <sub>8</sub> O <sub>14</sub> |
| FW (g mol <sup>-1</sup> )                   | 2058.13                                                                                                                       | 945.13                                                                                        | 1843.62                                                                                        |
| Crystal system                              | orthorhombic                                                                                                                  | monoclinic                                                                                    | triclinic                                                                                      |
| Space group                                 | <i>Pccn</i>                                                                                                                   | <i>C2/c</i>                                                                                   | <i>P-1</i>                                                                                     |
| Temperature (K)                             | 297                                                                                                                           | 293                                                                                           | 293                                                                                            |
| a (Å)                                       | 24.4222                                                                                                                       | 32.874                                                                                        | 12.3888                                                                                        |
| b (Å)                                       | 22.5632                                                                                                                       | 10.419                                                                                        | 13.7920                                                                                        |
| c (Å)                                       | 13.7569                                                                                                                       | 19.990                                                                                        | 18.7166                                                                                        |
| α (°)                                       | 90                                                                                                                            | 90                                                                                            | 88.227                                                                                         |
| β (°)                                       | 90                                                                                                                            | 97.14                                                                                         | 86.765                                                                                         |
| γ (°)                                       | 90                                                                                                                            | 90                                                                                            | 74.619                                                                                         |
| V (Å <sup>3</sup> )                         | 7580.6(3)                                                                                                                     | 6793.8                                                                                        | 3078.2                                                                                         |
| ρ <sub>calcd</sub> (Mg.m <sup>-3</sup> )    | 1.803                                                                                                                         | 1.848                                                                                         | 1.989                                                                                          |
| μ (mm <sup>-1</sup> )                       | 2.368                                                                                                                         | 14.393                                                                                        | 14.462                                                                                         |
| F (000)                                     | 4016.0                                                                                                                        | 3680.0                                                                                        | 1764.0                                                                                         |
| Independent reflections                     | 7855                                                                                                                          | 6046                                                                                          | 10861                                                                                          |
| R <sub>int</sub>                            | 0.0333                                                                                                                        | 0.1363                                                                                        | 0.0993                                                                                         |
| R <sub>1</sub> [ <i>I</i> > 2σ( <i>I</i> )] | 0.0384                                                                                                                        | 0.0964                                                                                        | 0.0738                                                                                         |
| wR <sub>2</sub> (all data)                  | 0.0893                                                                                                                        | 0.2719                                                                                        | 0.1880                                                                                         |
| Goodness of fit on F <sup>2</sup>           | 1.078                                                                                                                         | 0.987                                                                                         | 0.988                                                                                          |
| CCDC numbers                                | 2306039                                                                                                                       | 2306040                                                                                       | 2306041                                                                                        |

**Table S2.** Selected bond lengths (Å) and angles (°) for **1**.

|           |            |            |            |
|-----------|------------|------------|------------|
| Dy1-O1    | 2.280(3)   | Dy1-O5     | 2.305(3)   |
| Dy1-O2    | 2.316(3)   | Dy1-O6     | 2.329(3)   |
| Dy1-O3    | 2.339(3)   | Dy1-N1     | 2.650(3)   |
| Dy1-O4    | 2.285(3)   | Dy1-N3     | 2.555(4)   |
| O1-Dy1-O2 | 73.81(12)  | O5-Dy1-O2  | 78.87(13)  |
| O1-Dy1-O3 | 77.61(12)  | O5-Dy1-O3  | 139.42(12) |
| O1-Dy1-O4 | 108.68(13) | O5-Dy1-O6  | 73.64(12)  |
| O1-Dy1-O5 | 83.83(12)  | O5-Dy1-N1  | 67.76(11)  |
| O1-Dy1-O6 | 147.50(12) | O5-Dy1-N3  | 99.01(12)  |
| O1-Dy1-N1 | 77.00(11)  | O6-Dy1-O3  | 134.30(12) |
| O1-Dy1-N3 | 133.43(12) | O6-Dy1-N1  | 113.93(12) |
| O2-Dy1-O3 | 128.06(13) | O6-Dy1-N3  | 74.29(12)  |
| O2-Dy1-O6 | 79.00(12)  | N3-Dy1-N1  | 61.97(11)  |
| O2-Dy1-N1 | 137.47(12) | C5-O1-Dy1  | 135.9(3)   |
| O2-Dy1-N3 | 152.62(13) | C7-O2-Dy1  | 131.5(3)   |
| O3-Dy1-N1 | 73.01(12)  | C13-O3-Dy1 | 136.8(3)   |
| O3-Dy1-N3 | 70.42(13)  | C15-O4-Dy1 | 133.4(3)   |
| O4-Dy1-O2 | 76.29(12)  | C21-O5-Dy1 | 136.6(3)   |
| O4-Dy1-O3 | 73.11(12)  | C23-O6-Dy1 | 132.2(4)   |
| O4-Dy1-O5 | 147.46(12) | N21-N1-Dy1 | 121.3(3)   |
| O4-Dy1-O6 | 81.22(13)  | C25-N1-Dy1 | 119.9(3)   |
| O4-Dy1-N1 | 143.36(12) | C26-N3-Dy1 | 123.9(3)   |
| O4-Dy1-N3 | 93.60(12)  | C30-N3-Dy1 | 117.5(3)   |

**Table S3.** Selected bond lengths (Å) and angles (°) for **2**.

|           |           |           |           |
|-----------|-----------|-----------|-----------|
| Dy1-O1    | 2.318(12) | Dy1-O5    | 2.269(11) |
| Dy1-O2    | 2.265(13) | Dy1-O6    | 2.333(11) |
| Dy1-O3    | 2.290(12) | Dy1-N3    | 2.626(13) |
| Dy1-O4    | 2.323(12) | Dy1-N1    | 2.528(15) |
| O1-Dy1-N3 | 81.4(5)   | O5-Dy1-O3 | 132.3(5)  |
| O1-Dy1-N1 | 143.4(6)  | O5-Dy1-O4 | 150.2(6)  |
| O2-Dy1-O1 | 72.8(5)   | O5-Dy1-O6 | 71.8(5)   |
| O2-Dy1-O3 | 98.2(6)   | O5-Dy1-N3 | 70.1(5)   |
| O2-Dy1-O4 | 77.3(6)   | O5-Dy1-N1 | 89.9(6)   |
| O2-Dy1-O5 | 107.4(6)  | O6-Dy1-O1 | 127.2(5)  |

|           |          |            |           |
|-----------|----------|------------|-----------|
| O2-Dy1-O6 | 81.1(6)  | O6-Dy1-N3  | 120.8(5)  |
| O2-Dy1-N3 | 153.5(6) | O6-Dy1-N1  | 74.4(5)   |
| O2-Dy1-N1 | 143.8(6) | N1-Dy1-N3  | 62.1(6)   |
| O3-Dy1-O1 | 76.7(6)  | C5-O1-Dy1  | 136.0(16) |
| O3-Dy1-O4 | 73.8(5)  | C7-O2-Dy1  | 131.9(13) |
| O3-Dy1-O6 | 153.4(5) | C13-O3-Dy1 | 138.4(15) |
| O3-Dy1-N3 | 69.2(5)  | C15-O4-Dy1 | 130.3(12) |
| O3-Dy1-N1 | 92.5(6)  | C21-O5-Dy1 | 138.4(16) |
| O4-Dy1-O1 | 134.0(6) | C23-O6-Dy1 | 133.2(12) |
| O4-Dy1-O6 | 80.2(5)  | C25-N3-Dy1 | 123.9(15) |
| O4-Dy1-N3 | 118.6(5) | C28-N3-Dy1 | 116.8(14) |
| O4-Dy1-N1 | 72.7(6)  | N2-N1-Dy1  | 124.5(13) |
| O5-Dy1-O1 | 73.5(6)  | C29-N1-Dy1 | 122.7(15) |

**Table S4.** Selected bond lengths (Å) and angles (°) for **3**.

|            |           |            |           |
|------------|-----------|------------|-----------|
| Dy1-N2     | 2.627(10) | Dy2-N6     | 2.668(10) |
| Dy1-N3     | 2.552(9)  | Dy2-N7     | 2.572(9)  |
| Dy1-O7     | 2.401(9)  | Dy2-O1     | 2.509(8)  |
| Dy1-O8     | 2.356(8)  | Dy2-O2     | 2.371(9)  |
| Dy1-O9     | 2.325(9)  | Dy2-O3     | 2.376(8)  |
| Dy1-O10    | 2.337(8)  | Dy2-O4     | 2.338(9)  |
| Dy1-O11    | 2.520(8)  | Dy2-O5     | 2.394(9)  |
| Dy1-O12    | 2.341(9)  | Dy2-O6     | 2.390(9)  |
| Dy1-O13    | 2.398(7)  | Dy2-O14    | 2.398(8)  |
| N3-Dy1-N2  | 62.7(5)   | O3-Dy2-N6  | 147.1(5)  |
| O7-Dy1-N2  | 100.5(5)  | O3-Dy2-N7  | 135.9(5)  |
| O7-Dy1-N3  | 66.1(5)   | O3-Dy2-O1  | 68.2(4)   |
| O7-Dy1-O11 | 133.1(4)  | O3-Dy2-O5  | 77.3(5)   |
| O8-Dy1-N2  | 70.0(5)   | O3-Dy2-O6  | 76.0(5)   |
| O8-Dy1-N3  | 105.5(5)  | O3-Dy2-O14 | 86.1(4)   |
| O8-Dy1-O7  | 70.5(4)   | O4-Dy2-N6  | 133.8(4)  |
| O8-Dy1-O11 | 127.9(4)  | O4-Dy2-N7  | 72.5(4)   |
| O8-Dy1-O13 | 68.1(4)   | O4-Dy2-O1  | 73.3(4)   |
| O9-Dy1-N2  | 147.0(5)  | O4-Dy2-O2  | 80.8(5)   |
| O9-Dy1-N3  | 135.7(5)  | O4-Dy2-O3  | 75.1(5)   |
| O9-Dy1-O7  | 74.2(5)   | O4-Dy2-O5  | 137.1(5)  |

---

|             |          |             |           |
|-------------|----------|-------------|-----------|
| O9-Dy1-O8   | 77.7(5)  | O4-Dy2-O6   | 71.1(5)   |
| O9-Dy1-O11  | 70.2(4)  | O4-Dy2-O14  | 141.7(4)  |
| O9-Dy1-O12  | 136.6(4) | O5-Dy2-N6   | 70.1(5)   |
| O9-Dy1-O13  | 83.2(4)  | O5-Dy2-N7   | 108.2(5)  |
| O10-Dy1-N2  | 134.2(4) | O5-Dy2-O1   | 124.3(5)  |
| O10-Dy1-N3  | 73.1(4)  | O5-Dy2-O14  | 66.5(4)   |
| O10-Dy1-O7  | 70.2(4)  | O6-Dy2-N6   | 97.1(5)   |
| O10-Dy1-O8  | 137.1(5) | O6-Dy2-N7   | 65.8(5)   |
| O10-Dy1-O9  | 75.7(4)  | O6-Dy2-O1   | 134.6(4)  |
| O10-Dy1-O11 | 72.0(4)  | O6-Dy2-O5   | 70.8(5)   |
| O10-Dy1-O12 | 80.8(4)  | O6-Dy2-O14  | 136.4(4)  |
| O10-Dy1-O13 | 139.4(4) | O14-Dy2-N6  | 76.9(4)   |
| O11-Dy1-N2  | 125.9(5) | O14-Dy2-N7  | 137.1(4)  |
| O11-Dy1-N3  | 126.2(4) | O14-Dy2-O1  | 68.7(4)   |
| O12-Dy1-N2  | 71.8(5)  | C18-N2-Dy1  | 127.3(13) |
| O12-Dy1-N3  | 66.9(5)  | C19-N2-Dy1  | 118.3(11) |
| O12-Dy1-O7  | 130.0(4) | N4-N3-Dy1   | 125.1(10) |
| O12-Dy1-O8  | 139.6(4) | C20-N3-Dy1  | 123.3(12) |
| O12-Dy1-O11 | 68.1(4)  | C22-N6-Dy2  | 117.4(12) |
| O12-Dy1-O13 | 92.1(4)  | C25-N6-Dy2  | 126.0(12) |
| O13-Dy1-N2  | 78.6(4)  | N8-N7-Dy2   | 124.6(10) |
| O13-Dy1-N3  | 139.9(5) | C21-N7-Dy2  | 122.8(12) |
| O13-Dy1-O7  | 136.0(4) | C4-O1-Dy2   | 130.4(12) |
| O13-Dy1-O11 | 68.2(4)  | C2-O2-Dy2   | 128.7(14) |
| N7-Dy2-N6   | 62.3(5)  | C9-O3-Dy2   | 132.6(14) |
| O1-Dy2-N6   | 128.0(4) | C7-O4-Dy2   | 133.0(14) |
| O1-Dy2-N7   | 127.1(4) | C12-O5-Dy2  | 132.6(14) |
| O2-Dy2-N6   | 73.8(5)  | C14-O6-Dy2  | 137.1(14) |
| O2-Dy2-N7   | 66.9(4)  | C29-O7-Dy1  | 133.7(13) |
| O2-Dy2-O1   | 68.7(4)  | C27-O8-Dy1  | 139.2(13) |
| O2-Dy2-O3   | 135.0(4) | C32-O9-Dy1  | 130.7(13) |
| O2-Dy2-O5   | 140.4(5) | C34-O10-Dy1 | 132.6(13) |
| O2-Dy2-O6   | 130.2(5) | C37-O11-Dy1 | 128.4(12) |
| O2-Dy2-O14  | 90.2(4)  | C39-O12-Dy1 | 132.2(13) |

---

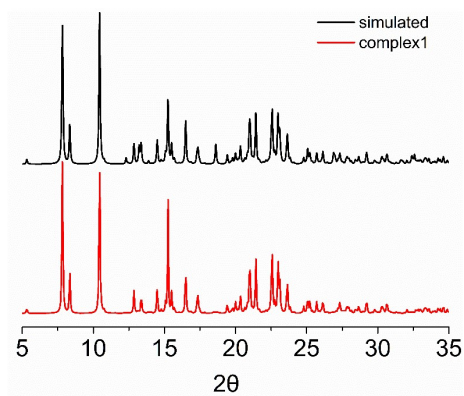

**Fig. S2.** PXRD analysis of complex **1**. The black line is simulated data from single crystal data.

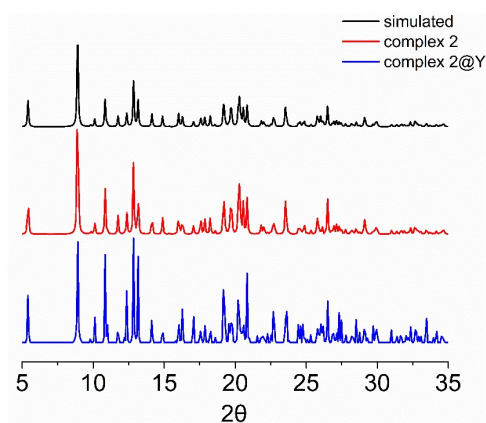

**Fig. S3.** PXRD analysis of complex **2** and **2@Y**. The black line is simulated data from single crystal data.

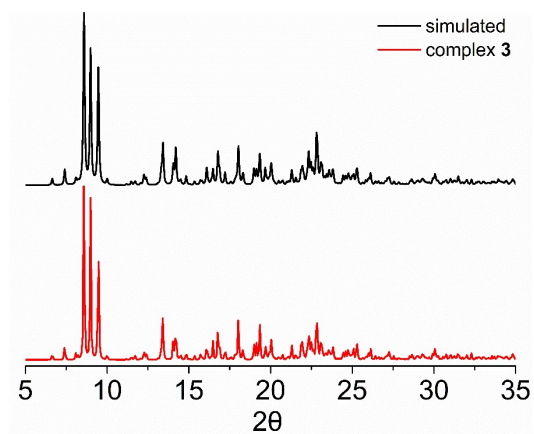

**Fig. S4.** PXRD analysis of complex **3**. The black line is simulated data from single crystal data.

**Table S5.** Continuous Shape Measures (CSHMs) of the coordination geometry for Dy<sup>III</sup> ion in compounds **1–3** (*S* values calculated with the Shape program). The *S* values indicated the proximity to the ideal polyhedron, thus, *S* = 0 corresponds to the non-distorted polyhedron. The three closer ideal geometries to the real complexes are listed and below are the symmetry and description for each polyhedron.

| Complexes |     | <i>s</i> | polyhedron                                          |
|-----------|-----|----------|-----------------------------------------------------|
| <b>1</b>  | Dy1 | 0.988    | TDD-8, $D_{2d}$ , Triangular dodecahedron           |
|           |     | 1.322    | SAPR-8, $D_{4d}$ , Square antiprism                 |
|           |     | 2.267    | BTPR-8, $C_{2v}$ , Biaugmented trigonal prism       |
| <b>2</b>  | Dy1 | 0.532    | TDD-8, $D_{2d}$ , Triangular dodecahedron           |
|           |     | 2.542    | SAPR-8, $D_{4d}$ , Square antiprism                 |
|           |     | 2.594    | BTPR-8, $C_{2v}$ , Biaugmented trigonal prism       |
| <b>3</b>  | Dy1 | 0.541    | CSAPR-9, $C_{4v}$ Spherical capped square antiprism |
|           |     | 0.994    | MFF-9, Cs Muffin                                    |
|           |     | 1.161    | JCSAPR-9, $C_{4v}$ Capped square antiprism J10      |
|           | Dy2 | 0.612    | CSAPR-9, $C_{4v}$ Spherical capped square antiprism |
|           |     | 0.965    | MFF-9, Cs Muffin                                    |
|           |     | 1.308    | JCSAPR-9, $C_{4v}$ Capped square antiprism J10      |

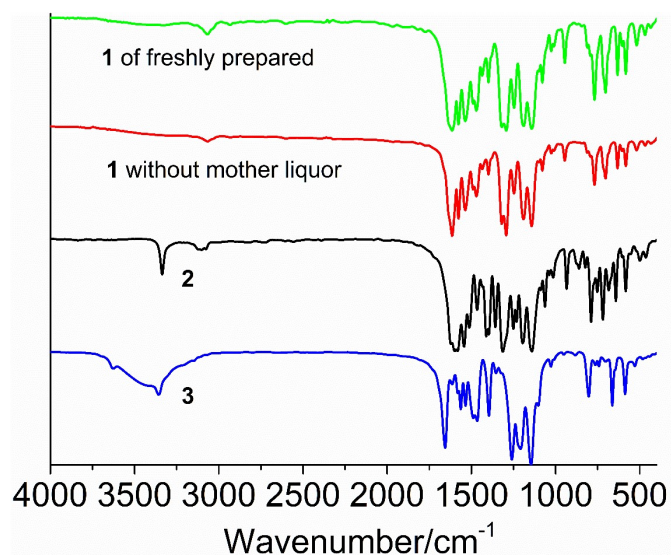

**Fig. S5.** The IR spectrum of **1**, **2** and **3**.

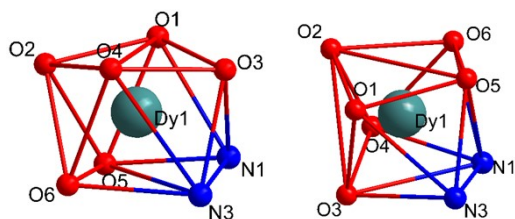

Fig. S6. The local coordination of complexes **1** (left) and **2** (right).

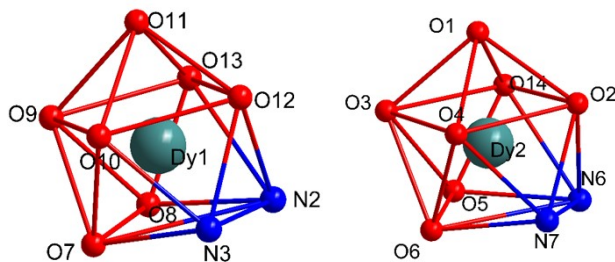

Fig. S7. The local coordination of complex **3**.

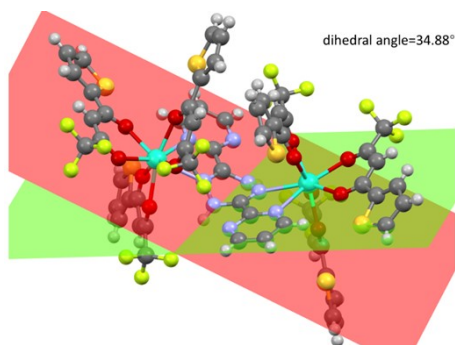

Fig. S8. The dihedral angle of the two opening rings of the H<sub>2</sub>bmtz ligand in complex **2**.

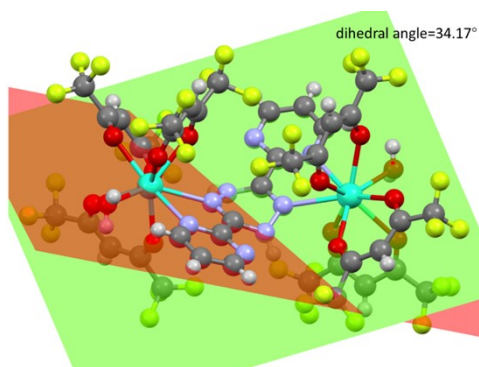

Fig. S9. The dihedral angle of the two opening rings of the H<sub>2</sub>bmtz ligand in complex **3**.

Table S6. the intramolecular and nearest intermolecular Dy...Dy distance for **1-3**.

| Complex  | the intramolecular Dy...Dy distance(Å) | the nearest intermolecular Dy...Dy distance(Å) |
|----------|----------------------------------------|------------------------------------------------|
| <b>1</b> | 7.985                                  | 9.156                                          |
| <b>2</b> | 7.460                                  | 10.019                                         |
| <b>3</b> | 7.683                                  | 6.177                                          |



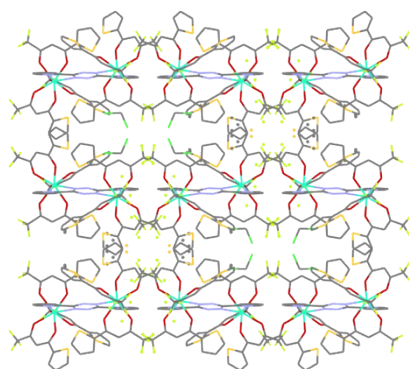

Fig. S10. The packing structure of complex 1.

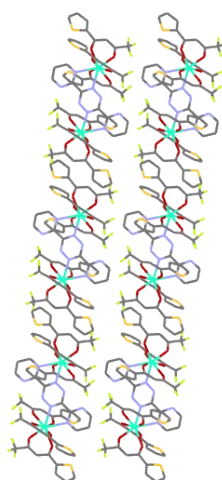

Fig. S11. The packing structure of complex 2.

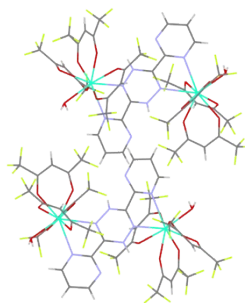

Fig. S12. The packing structure of complex 3.

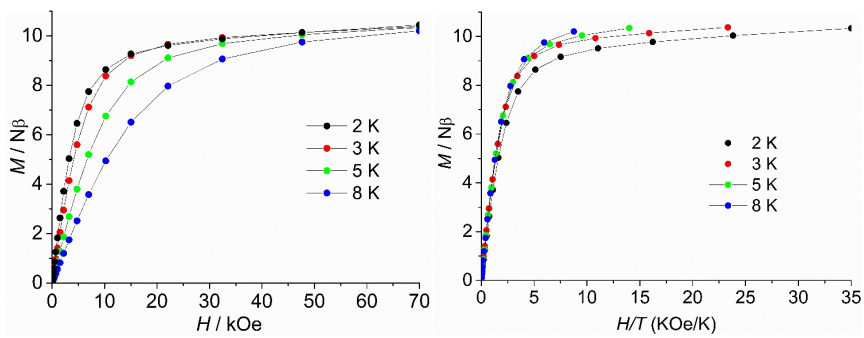

Fig. S13. Field dependence of the magnetization between 2 and 8 K for 1.

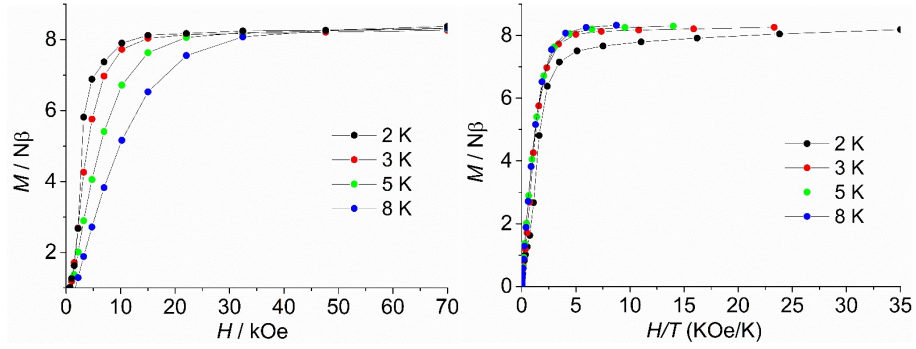

Fig. S14. Field dependence of the magnetization between 2 and 8 K for **2**.

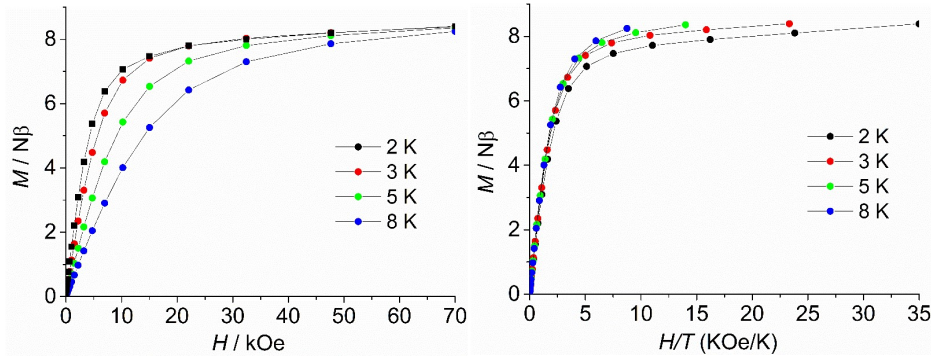

Fig. S15. Field dependence of the magnetization between 2 and 8 K for **3**.

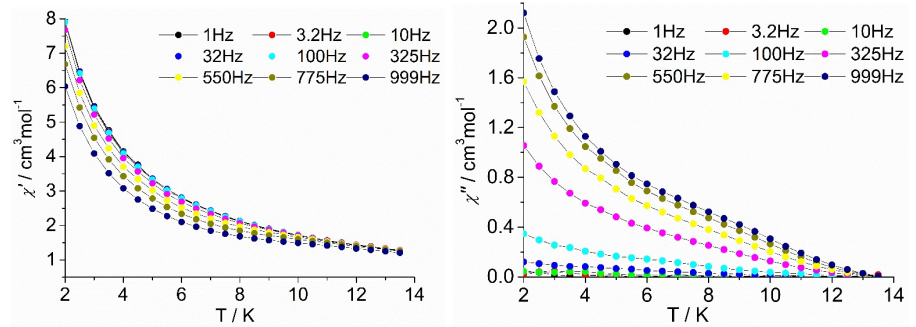

Fig. S16. Temperature dependence of the in-phase ( $\chi'$ ) ac susceptibility (left) and temperature dependence of the out-of-phase ( $\chi''$ ) ac susceptibility (right) of complex **1** under zero dc field.

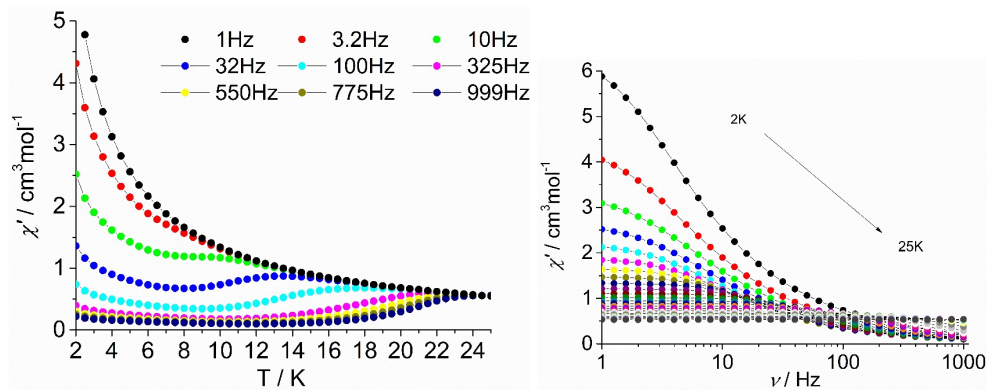

Fig. S17. Temperature dependence of the in-phase ( $\chi'$ ) ac susceptibility (left) and frequency dependence of the in-phase ( $\chi'$ ) ac susceptibility (right) of complex **2** under zero dc field.

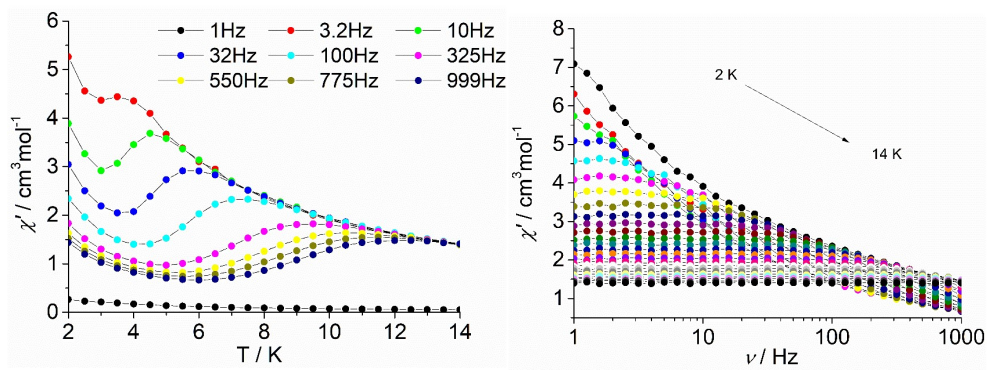

**Fig. S18.** Temperature dependence of the in-phase ( $\chi'$ ) ac susceptibility (left) and frequency dependence of the in-phase ( $\chi'$ ) ac susceptibility (right) of complex **3** under zero dc field.

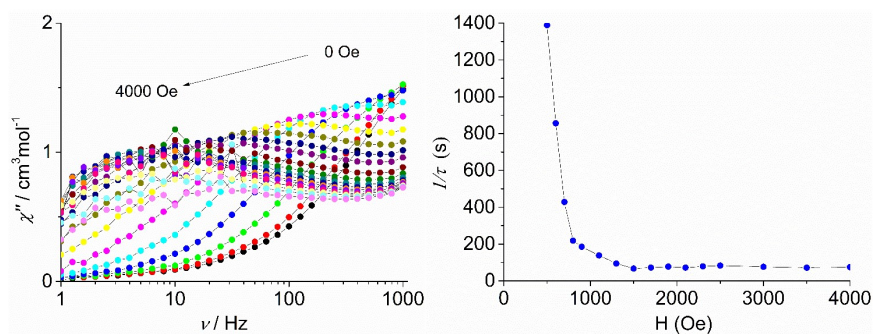

**Fig. S19.** Plot of the frequency dependence of the out-of-phase ( $\chi''$ ) ac susceptibility component under indicated dc field at 3 K for complex **1** (left). Plot of  $1/\tau$  vs.  $H$  for **1** under different dc fields at 3 K (right).

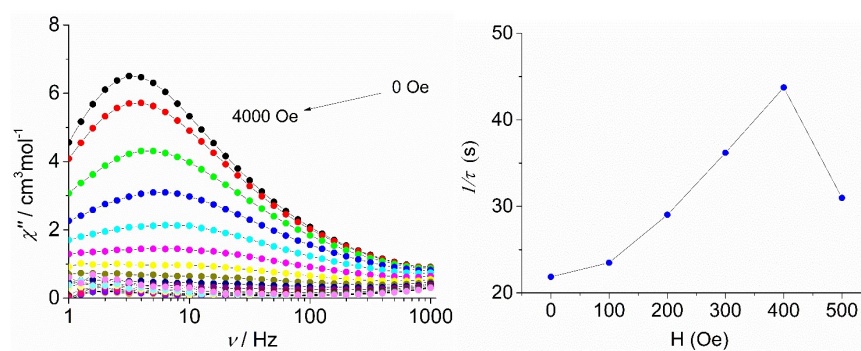

**Fig. S20.** Plot of the frequency dependence of the out-of-phase ( $\chi''$ ) ac susceptibility component under indicated dc field at 3 K for complex **2** (left). Plot of  $1/\tau$  vs.  $H$  for **2** under different dc fields at 3 K (right).

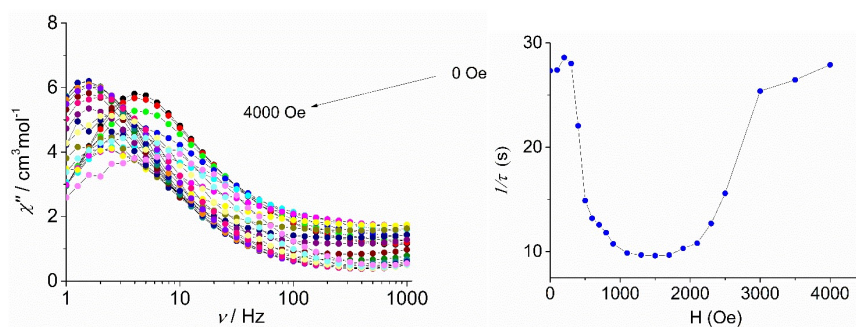

**Fig. S21.** Plot of the frequency dependence of the out-of-phase ( $\chi''$ ) ac susceptibility component under indicated dc field at 3 K for complex **3** (left). Plot of  $1/\tau$  vs.  $H$  for **3** under different dc fields at 3 K (right).

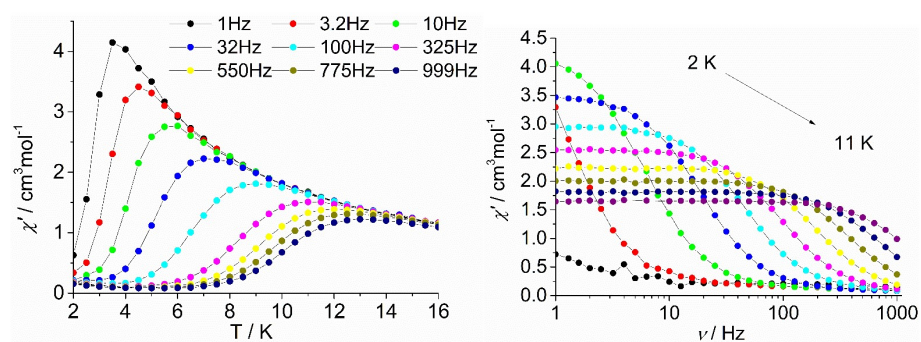

**Fig. S22.** Temperature dependence of the in-phase ( $\chi'$ ) ac susceptibility (left) and frequency dependence of the in-phase ( $\chi'$ ) ac susceptibility (right) of complex **1** under 1500 Oe dc field.

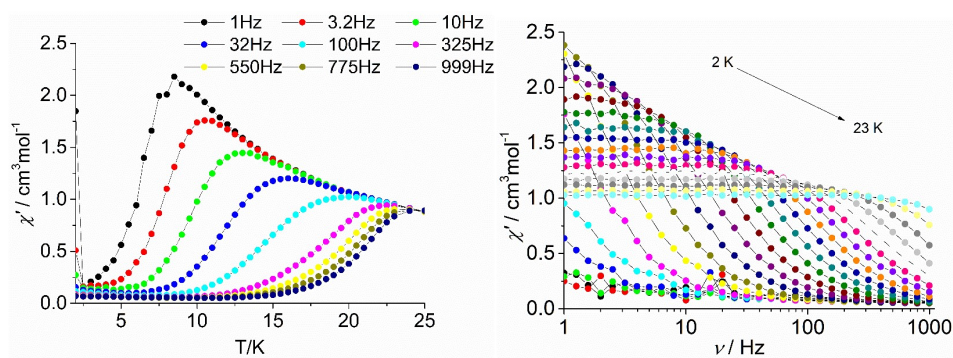

**Fig. S23.** Temperature dependence of the in-phase ( $\chi'$ ) ac susceptibility (left) and frequency dependence of the in-phase ( $\chi'$ ) ac susceptibility (right) of complex **2** under 1500 Oe dc field.

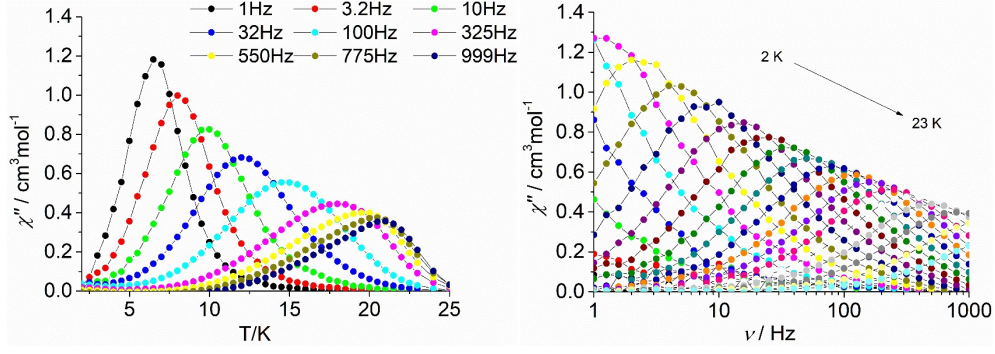

**Fig. S24.** Temperature dependence of the out-of-phase ( $\chi''$ ) ac susceptibility (left) and frequency dependence of the out-of-phase ( $\chi''$ ) ac susceptibility (right) of complex **2** under 1500 Oe dc field.

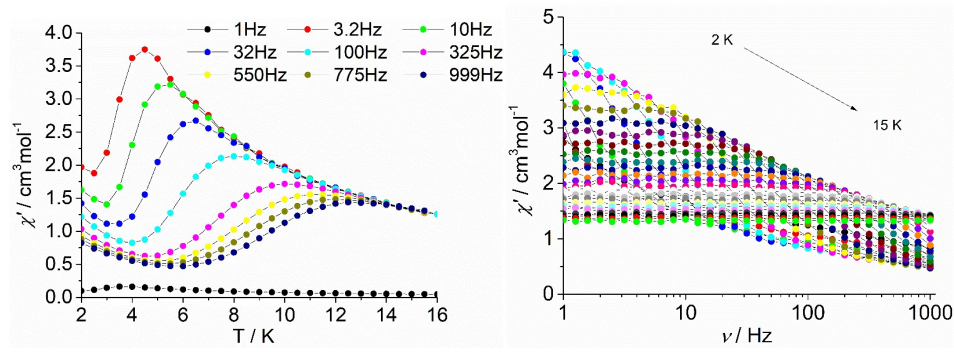

**Fig. S25.** Temperature dependence of the in-phase ( $\chi'$ ) ac susceptibility (left) and frequency dependence of the in-phase ( $\chi'$ ) ac susceptibility (right) of complex **3** under 1500 Oe dc field.

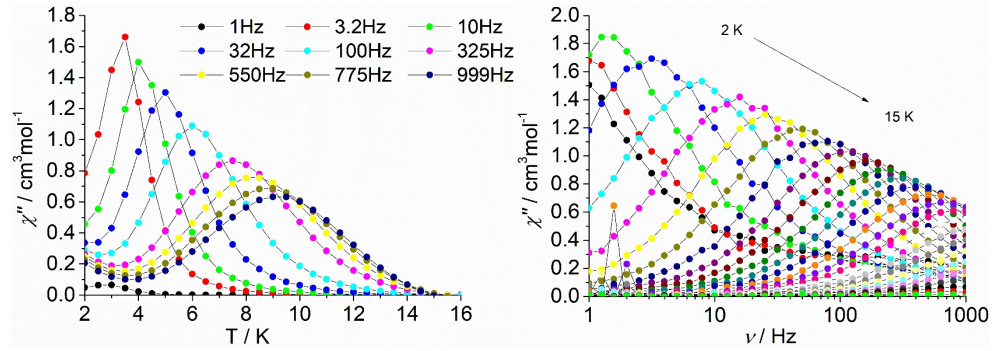

**Fig. S26.** Temperature dependence of the out-of-phase ( $\chi''$ ) ac susceptibility (left) and frequency dependence of the out-of-phase ( $\chi''$ ) ac susceptibility (right) of complex **3** under 1500 Oe dc field.

**Table S7.** Energy barriers obtained from the Arrhenius law fitting and Equation 1 of the out-of-phase ( $\chi''$ ) ac susceptibility data under zero field.

| Relaxation processes | Raman, QTM and Orbach processes |                             |      |                   |              |
|----------------------|---------------------------------|-----------------------------|------|-------------------|--------------|
|                      | q (s)                           | C ( $s^{-1} \cdot K^{-n}$ ) | n    | $U_{eff}/k_B$ (K) | $\tau_0$ (s) |
| <b>2</b>             | 0.03                            | 0.20                        | 2.80 | 135(3)            | 3.74E-7      |

|            |      |         |      |        |         |
|------------|------|---------|------|--------|---------|
| <b>3</b>   | 0.23 | 0.49    | 3.53 | 46(7)  | 1.41E-6 |
| <b>2@Y</b> | 0.76 | 4.69E-4 | 5.21 | 142(4) | 1.32E-8 |

**Table S8.** Energy barriers obtained from the Arrhenius law fitting and Equation 2 of the out-of-phase ( $\chi''$ ) ac susceptibility data under 1500 Oe dc field.

| Relaxation processes | Raman and Orbach processes  |      |                          |              |
|----------------------|-----------------------------|------|--------------------------|--------------|
|                      | C ( $s^{-1} \cdot K^{-n}$ ) | n    | $U_{\text{eff}}/k_B$ (K) | $\tau_0$ (s) |
| <b>1</b>             | 0.03                        | 5.04 | 73(3)                    | 2.15E-6      |
| <b>2</b>             | 1.63E-4                     | 5.51 | 227(4)                   | 1.40E-8      |
| <b>3</b>             | 0.04                        | 5.04 | 62(8)                    | 1.39E-6      |
| <b>2@Y</b>           | 1.57E-4                     | 5.53 | 198(1)                   | 9.17E-8      |

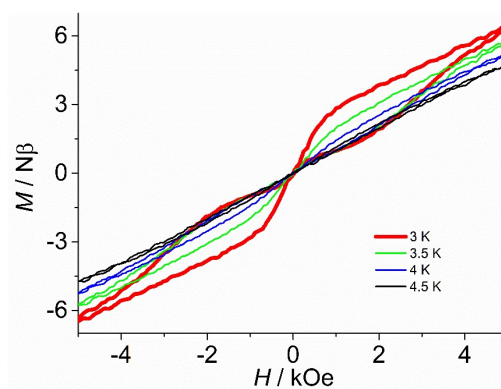

**Fig. S27.** Field dependence of magnetization of **2** at 50 Oe s<sup>-1</sup>.

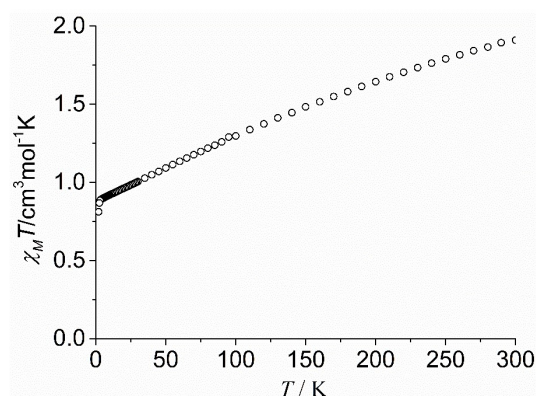

**Fig. S28.** Temperature dependence of the magnetic susceptibility  $\chi_M T$  at 1000 Oe for complexes **2@Y**.

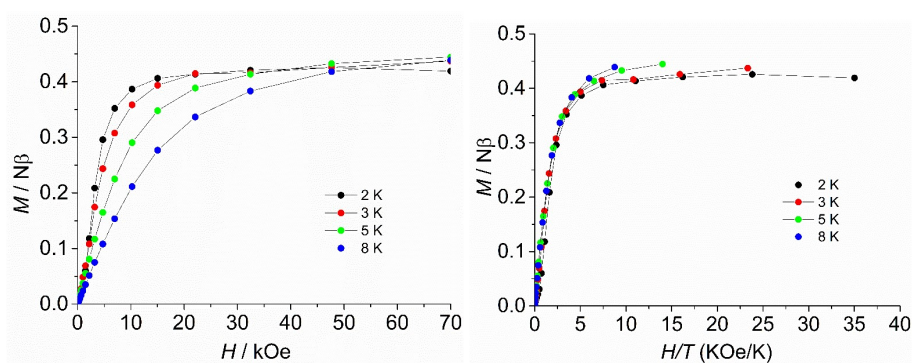

Fig. S29. Field dependence of the magnetization between 2 and 8 K for **2@Y**.

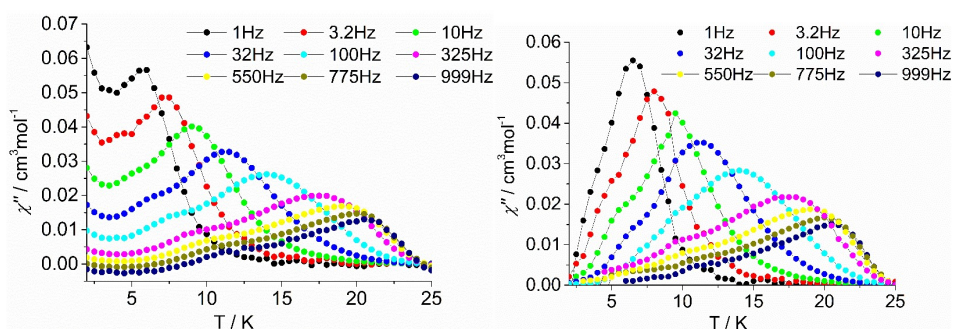

Fig. S30. Temperature dependence of the out-of-phase ( $\chi''$ ) ac susceptibility of complex **2@Y** under zero dc field (left) and 1500 Oe dc field (right).

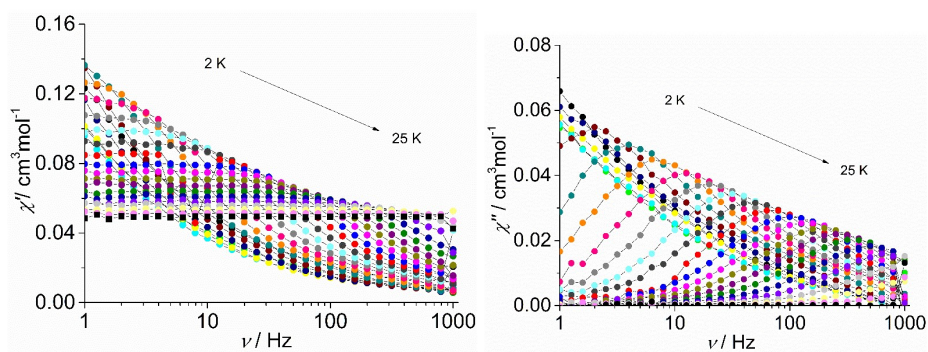

Fig. S31. Frequency dependence of the in-phase ( $\chi'$ ) and the out-of-phase ( $\chi''$ ) ac susceptibility (left) of complex **2@Y** under zero dc field.

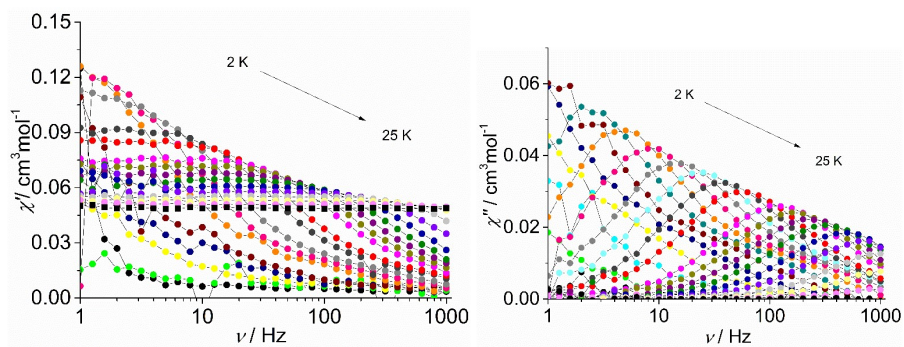

Fig. S32. Frequency dependence of the in-phase ( $\chi'$ ) and the out-of-phase ( $\chi''$ ) ac susceptibility (left) of complex **2@Y** under 1500 Oe dc field.

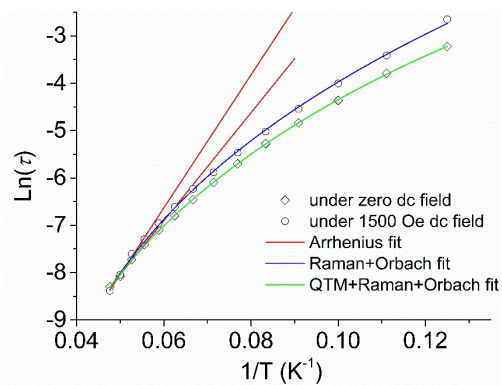

Fig. S33. The  $\ln(\tau)$  vs.  $T^{-1}$  plot for complexes **2@Y** on the ac susceptibility data.

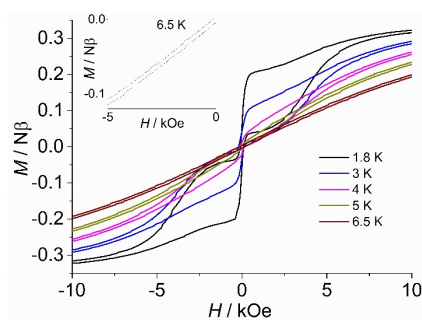

Fig. S34. Field dependence of magnetization of **2@Y** at 200 Oe  $s^{-1}$ .

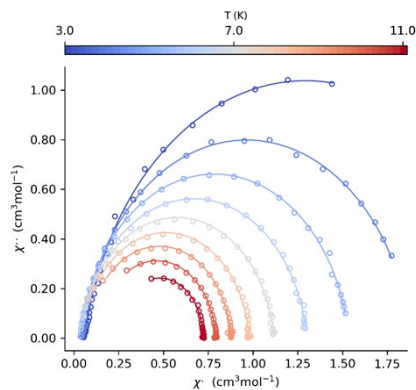

Fig. S35. Cole-Cole (Argand) plot for **1** obtained using the ac susceptibility data. The solid lines correspond to the best fit obtained with a generalized Debye model under 1500 Oe dc field.

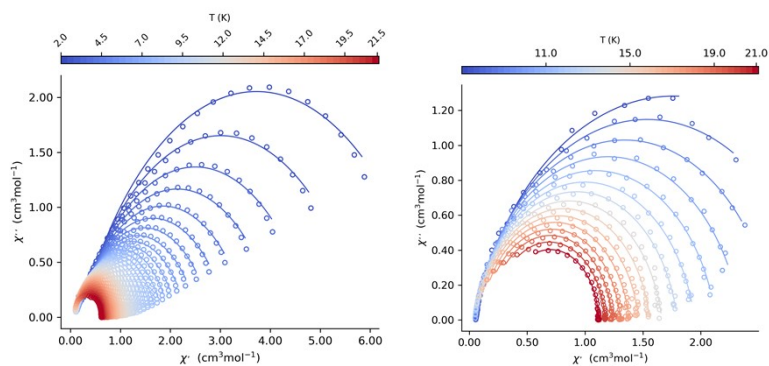

Fig. S36. Cole-Cole (Argand) plot for **2** obtained using the ac susceptibility data. The solid lines correspond to the best fit obtained with a generalized Debye model under zero dc field (left) and 1500 Oe dc field (right).



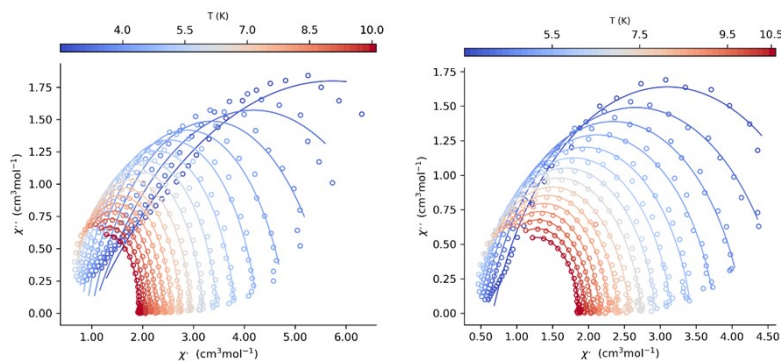

**Fig. S37.** Cole-Cole (Argand) plot for **3** obtained using the ac susceptibility data. The solid lines correspond to the best fit obtained with a generalized Debye model under zero dc field (left) and 1500 Oe dc field (right).

**Table S9.** Best fitted parameters ( $\chi_T$ ,  $\chi_S$ ,  $\tau$  and  $\alpha$ ) with the extended Debye model for complex **1** at 1500 Oe in the temperature range 3-11 K.

| T/ K | $\chi_S / \text{cm}^3 \text{mol}^{-1}$ | $\chi_T / \text{cm}^3 \text{mol}^{-1}$ | $\tau/\text{s}$ | $\alpha$ |
|------|----------------------------------------|----------------------------------------|-----------------|----------|
| 3    | 0.061                                  | 2.525                                  | 0.135           | 0.108    |
| 4    | 0.045                                  | 1.882                                  | 0.026           | 0.088    |
| 5    | 0.034                                  | 1.534                                  | 0.008           | 0.079    |
| 6    | 0.038                                  | 1.300                                  | 0.003           | 0.073    |
| 7    | 0.038                                  | 1.116                                  | 0.001           | 0.065    |
| 8    | 0.050                                  | 0.978                                  | 0.000           | 0.055    |
| 9    | 0.076                                  | 0.877                                  | 0.000           | 0.050    |
| 10   | 0.133                                  | 0.792                                  | 0.000           | 0.034    |
| 11   | 0.23                                   | 0.721                                  | 0.000           | 0.002    |

**Table S10.** Best fitted parameters ( $\chi_T$ ,  $\chi_S$ ,  $\tau$  and  $\alpha$ ) with the extended Debye model for complex **2** at 0 Oe in the temperature range 2-21.5 K.

| T/ K | $\chi_S / \text{cm}^3 \text{mol}^{-1}$ | $\chi_T / \text{cm}^3 \text{mol}^{-1}$ | $\tau/\text{s}$ | $\alpha$ |
|------|----------------------------------------|----------------------------------------|-----------------|----------|
| 2    | 0.196                                  | 7.251                                  | 0.033           | 0.328    |
| 2.5  | 0.170                                  | 5.852                                  | 0.030           | 0.329    |
| 3    | 0.155                                  | 4.848                                  | 0.027           | 0.328    |
| 3.5  | 0.140                                  | 4.138                                  | 0.024           | 0.327    |
| 4    | 0.135                                  | 3.572                                  | 0.021           | 0.322    |
| 4.5  | 0.130                                  | 3.166                                  | 0.018           | 0.318    |
| 5    | 0.126                                  | 2.838                                  | 0.017           | 0.311    |
| 5.5  | 0.123                                  | 2.563                                  | 0.015           | 0.303    |
| 6    | 0.122                                  | 2.340                                  | 0.014           | 0.291    |
| 6.5  | 0.122                                  | 2.150                                  | 0.012           | 0.276    |
| 7    | 0.122                                  | 1.983                                  | 0.013           | 0.258    |
| 7.5  | 0.121                                  | 1.843                                  | 0.010           | 0.240    |
| 8    | 0.121                                  | 1.719                                  | 0.008           | 0.220    |
| 8.5  | 0.194                                  | 1.641                                  | 0.007           | 0.201    |
| 9    | 0.117                                  | 1.520                                  | 0.006           | 0.182    |

|      |       |       |       |       |
|------|-------|-------|-------|-------|
| 9.5  | 0.114 | 1.436 | 0.005 | 0.165 |
| 10   | 0.111 | 1.363 | 0.004 | 0.153 |
| 10.5 | 0.108 | 1.289 | 0.004 | 0.138 |
| 11   | 0.105 | 1.229 | 0.003 | 0.128 |
| 11.5 | 0.101 | 1.171 | 0.003 | 0.120 |
| 12   | 0.100 | 1.118 | 0.002 | 0.110 |
| 12.5 | 0.098 | 1.072 | 0.002 | 0.103 |
| 13   | 0.097 | 1.026 | 0.001 | 0.096 |
| 13.5 | 0.096 | 0.986 | 0.001 | 0.091 |
| 14   | 0.097 | 0.951 | 0.001 | 0.084 |
| 14.5 | 0.097 | 0.918 | 0.001 | 0.080 |
| 15   | 0.098 | 0.888 | 0.001 | 0.075 |
| 15.5 | 0.101 | 0.861 | 0.000 | 0.070 |
| 16   | 0.105 | 0.833 | 0.000 | 0.066 |
| 16.5 | 0.109 | 0.807 | 0.000 | 0.060 |
| 17   | 0.115 | 0.784 | 0.000 | 0.057 |
| 17.5 | 0.121 | 0.761 | 0.000 | 0.054 |
| 18   | 0.131 | 0.739 | 0.000 | 0.048 |
| 18.5 | 0.141 | 0.718 | 0.000 | 0.042 |
| 19   | 0.151 | 0.698 | 0.000 | 0.038 |
| 19.5 | 0.166 | 0.680 | 0.000 | 0.028 |
| 20   | 0.183 | 0.662 | 0.000 | 0.021 |
| 20.5 | 0.204 | 0.648 | 0.000 | 0.008 |
| 21   | 0.228 | 0.633 | 0.000 | 0.004 |
| 21.5 | 0.249 | 0.616 | 0.000 | 0.006 |

**Table S11.** Best fitted parameters ( $\chi_T$ ,  $\chi_S$ ,  $\tau$  and  $\alpha$ ) with the extended Debye model for complex **2** at 1500 Oe in the temperature range 7-21 K.

| T/ K | $\chi_S / \text{cm}^3 \text{mol}^{-1}$ | $\chi_T / \text{cm}^3 \text{mol}^{-1}$ | $\tau/\text{s}$ | $\alpha$ |
|------|----------------------------------------|----------------------------------------|-----------------|----------|
| 7    | 0.044                                  | 3.487                                  | 0.152           | 0.184    |
| 8    | 0.048                                  | 3.026                                  | 0.069           | 0.163    |
| 9    | 0.044                                  | 2.640                                  | 0.034           | 0.14     |
| 10   | 0.048                                  | 2.348                                  | 0.018           | 0.131    |
| 11   | 0.048                                  | 2.131                                  | 0.010           | 0.124    |
| 12   | 0.050                                  | 1.945                                  | 0.006           | 0.115    |
| 13   | 0.056                                  | 1.797                                  | 0.004           | 0.107    |
| 14   | 0.062                                  | 1.663                                  | 0.002           | 0.101    |
| 15   | 0.070                                  | 1.558                                  | 0.001           | 0.098    |
| 16   | 0.082                                  | 1.463                                  | 0.001           | 0.092    |
| 17   | 0.102                                  | 1.379                                  | 0.000           | 0.084    |
| 18   | 0.125                                  | 1.306                                  | 0.000           | 0.081    |
| 19   | 0.165                                  | 1.236                                  | 0.000           | 0.064    |
| 20   | 0.210                                  | 1.173                                  | 0.000           | 0.048    |
| 21   | 0.248                                  | 1.116                                  | 0.000           | 0.019    |

**Table S12.** Best fitted parameters ( $\chi_T$ ,  $\chi_S$ ,  $\tau$  and  $\alpha$ ) with the extended Debye model for complex **3** at 0 Oe in the temperature range 2.5-10 K.

| T/ K | $\chi_S / \text{cm}^3 \text{mol}^{-1}$ | $\chi_T / \text{cm}^3 \text{mol}^{-1}$ | $\tau/\text{s}$ | $\alpha$ |
|------|----------------------------------------|----------------------------------------|-----------------|----------|
| 2.5  | 0.960                                  | 10.512                                 | 0.128           | 0.541    |
| 3    | 1.017                                  | 7.346                                  | 0.042           | 0.412    |
| 3.5  | 0.984                                  | 5.722                                  | 0.018           | 0.286    |
| 4    | 0.891                                  | 4.852                                  | 0.009           | 0.208    |
| 4.5  | 0.794                                  | 4.270                                  | 0.005           | 0.163    |
| 5    | 0.709                                  | 3.832                                  | 0.003           | 0.137    |
| 5.5  | 0.650                                  | 3.474                                  | 0.002           | 0.143    |
| 6    | 0.605                                  | 3.190                                  | 0.001           | 0.009    |
| 6.5  | 0.572                                  | 2.953                                  | 0.000           | 0.008    |
| 7    | 0.565                                  | 2.746                                  | 0.000           | 0.007    |
| 7.5  | 0.558                                  | 2.563                                  | 0.000           | 0.006    |
| 8    | 0.560                                  | 2.417                                  | 0.000           | 0.005    |
| 8.5  | 0.584                                  | 2.270                                  | 0.000           | 0.004    |
| 9    | 0.606                                  | 2.152                                  | 0.000           | 0.003    |
| 9.5  | 0.656                                  | 2.039                                  | 0.000           | 0.002    |
| 10   | 0.701                                  | 1.941                                  | 0.000           | 0.001    |

**Table S13.** Best fitted parameters ( $\chi_T$ ,  $\chi_S$ ,  $\tau$  and  $\alpha$ ) with the extended Debye model for complex **3** at 1500 Oe in the temperature range 3.5-10.5 K.

| T/ K | $\chi_S / \text{cm}^3 \text{mol}^{-1}$ | $\chi_T / \text{cm}^3 \text{mol}^{-1}$ | $\tau/\text{s}$ | $\alpha$ |
|------|----------------------------------------|----------------------------------------|-----------------|----------|
| 3.5  | 0.664                                  | 5.532                                  | 0.052           | 0.254    |
| 4    | 0.582                                  | 4.731                                  | 0.021           | 0.207    |
| 4.5  | 0.526                                  | 4.162                                  | 0.009           | 0.169    |
| 5    | 0.479                                  | 3.770                                  | 0.005           | 0.152    |
| 5.5  | 0.449                                  | 3.434                                  | 0.003           | 0.136    |
| 6    | 0.434                                  | 3.158                                  | 0.002           | 0.120    |
| 6.5  | 0.426                                  | 2.937                                  | 0.001           | 0.112    |
| 7    | 0.420                                  | 2.741                                  | 0.000           | 0.107    |
| 7.5  | 0.419                                  | 2.571                                  | 0.000           | 0.102    |
| 8    | 0.471                                  | 2.412                                  | 0.000           | 0.089    |
| 8.5  | 0.473                                  | 2.286                                  | 0.000           | 0.083    |
| 9    | 0.504                                  | 2.156                                  | 0.000           | 0.072    |
| 9.5  | 0.535                                  | 2.058                                  | 0.000           | 0.075    |
| 10   | 0.615                                  | 1.958                                  | 0.000           | 0.058    |
| 10.5 | 0.689                                  | 1.869                                  | 0.000           | 0.045    |

## Computational details

Complexes **1** and **2** with central symmetrical structure have one type of magnetic center Dy<sup>III</sup> ion and binuclear complex **3** have two types of magnetic center Dy<sup>III</sup> ions. Complete-active-space self-consistent field (CASSCF) calculations on individual Dy<sup>III</sup> fragments for complexes **1–3** on the basis of single-crystal X-ray determined geometry have been carried out with OpenMolcas<sup>51</sup> program package. Each individual Dy<sup>III</sup> fragment in **1–3** was

calculated keeping the experimentally determined structure of the corresponding compound while replacing the neighboring Dy<sup>III</sup> ion by diamagnetic Lu<sup>III</sup>.

The basis sets for all atoms are atomic natural orbitals from the OpenMolcas ANO-RCC library: ANO-RCC-VTZP for Dy<sup>III</sup>; VTZ for close O and N; VDZ for distant atoms. The calculations employed the second order Douglas-Kroll-Hess Hamiltonian, where scalar relativistic contractions were taken into account in the basis set and the spin-orbit couplings were handled separately in the restricted active space state interaction (RASSI-SO) procedure.<sup>52–53</sup> Active electrons in 7 active orbitals include all *f* electrons (CAS (9 in 7) in the CASSCF calculation. To exclude all the doubts, we calculated all the roots in the active space. We have mixed the maximum number of spin-free state which was possible with our hardware (all from 21 sextets, 128 from 224 quadruplets, 130 from 490 doublets for Dy<sup>III</sup>). SINGLE\_ANISO<sup>54–56</sup> program was used to obtain the energy levels, *g* tensors, magnetic axes, *et al.* based on the above CASSCF/RASSI-SO calculations.

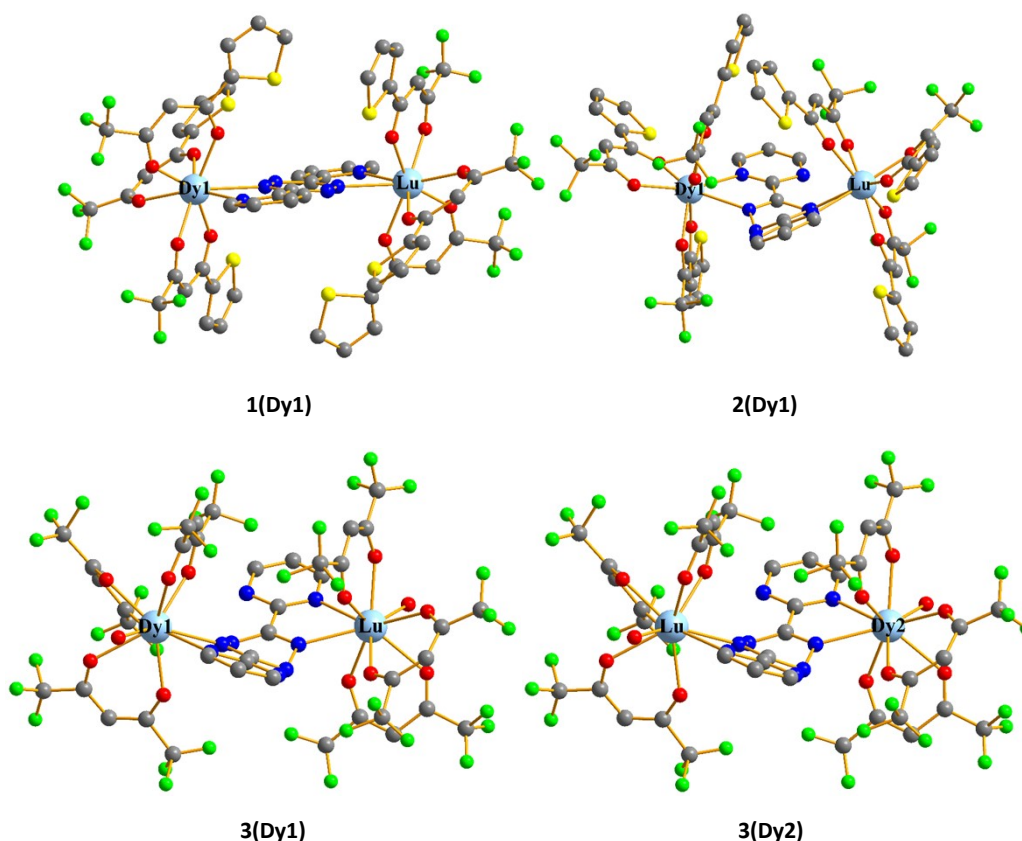

**Fig. S38.** Calculated model structures of individual Dy<sup>III</sup> fragments in complexes 1–3; H atoms are omitted for clarify.

**Table S14.** Calculated energy levels (cm<sup>-1</sup>), *g* (*g<sub>x</sub>*, *g<sub>y</sub>*, *g<sub>z</sub>*) tensors and predominant *m<sub>J</sub>* values of the lowest eight Kramers doublets (KDs) of individual Dy<sup>III</sup> fragments for complexes 1–3 using CASSCF/RASSI-SO with OpenMolcas.

| KDs | 1(Dy1)   |          |                      | 2(Dy1)   |          |                      |
|-----|----------|----------|----------------------|----------|----------|----------------------|
|     | <i>E</i> | <i>g</i> | <i>m<sub>J</sub></i> | <i>E</i> | <i>g</i> | <i>m<sub>J</sub></i> |
| 1   | 0.0      | 0.018    | ±15/2                | 0.0      | 0.010    | ±15/2                |
|     |          | 0.038    |                      |          | 0.016    |                      |
|     |          | 19.533   |                      |          | 19.330   |                      |
| 2   | 125.3    | 0.167    | ±13/2                | 121.7    | 0.460    | ±13/2                |
|     |          | 0.256    |                      |          | 1.270    |                      |
|     |          | 16.052   |                      |          | 15.788   |                      |

|     |               |                          |                      |               |                          |                      |
|-----|---------------|--------------------------|----------------------|---------------|--------------------------|----------------------|
| 3   | 173.2         | 1.301<br>1.911<br>12.351 | $\pm 7/2$            | 166.8         | 3.686<br>4.645<br>13.266 | $\pm 1/2$            |
| 4   | 210.8         | 8.009<br>5.940<br>3.737  | $\pm 1/2$            | 198.0         | 0.480<br>4.040<br>10.957 | $\pm 7/2$            |
| 5   | 263.2         | 2.606<br>3.086<br>12.719 | $\pm 3/2$            | 255.2         | 2.437<br>2.668<br>14.745 | $\pm 5/2$            |
| 6   | 370.1         | 0.150<br>0.555<br>17.719 | $\pm 7/2$            | 345.4         | 0.234<br>0.482<br>18.499 | $\pm 9/2$            |
| 7   | 436.3         | 0.035<br>0.454<br>15.528 | $\pm 9/2$            | 389.3         | 0.138<br>0.642<br>15.433 | $\pm 1/2$            |
| 8   | 479.7         | 0.083<br>0.396<br>17.550 | $\pm 5/2$            | 420.8         | 0.223<br>0.932<br>17.206 | $\pm 11/2$           |
| KDs | <b>3(Dy1)</b> |                          |                      | <b>3(Dy2)</b> |                          |                      |
|     | <i>E</i>      | <i>g</i>                 | <i>m<sub>j</sub></i> | <i>E</i>      | <i>g</i>                 | <i>m<sub>j</sub></i> |
| 1   | 0.0           | 0.021<br>0.026<br>19.408 | $\pm 15/2$           | 0.0           | 0.016<br>0.017<br>19.478 | $\pm 15/2$           |
| 2   | 122.5         | 1.322<br>1.436<br>16.335 | $\pm 13/2$           | 107.3         | 0.280<br>0.392<br>17.491 | $\pm 13/2$           |
| 3   | 171.7         | 10.703<br>7.140<br>3.041 | $\pm 11/2$           | 165.5         | 1.504<br>1.789<br>14.945 | $\pm 7/2$            |
| 4   | 185.2         | 0.081<br>2.034<br>13.049 | $\pm 5/2$            | 213.4         | 5.485<br>6.155<br>8.632  | $\pm 5/2$            |
| 5   | 232.1         | 2.205<br>2.627<br>14.093 | $\pm 3/2$            | 261.6         | 1.426<br>4.512<br>12.307 | $\pm 3/2$            |
| 6   | 255.6         | 1.825<br>2.306<br>14.008 | $\pm 3/2$            | 278.2         | 2.277<br>3.220<br>13.786 | $\pm 5/2$            |
| 7   | 283.0         | 0.196<br>1.017<br>14.056 | $\pm 1/2$            | 304.2         | 0.237<br>0.451<br>15.172 | $\pm 1/2$            |

|   |       |                          |           |       |                          |           |
|---|-------|--------------------------|-----------|-------|--------------------------|-----------|
| 8 | 329.1 | 0.039<br>0.379<br>17.331 | $\pm 3/2$ | 369.3 | 0.033<br>0.162<br>18.278 | $\pm 9/2$ |
|---|-------|--------------------------|-----------|-------|--------------------------|-----------|

**Table S15.** Wave functions with definite projection of the total moment  $|m_l\rangle$  for the lowest eight KDs of individual Dy<sup>III</sup> fragments for complexes **1–3**.

|               | $E/\text{cm}^{-1}$ | wave functions                                                                                                                                                                  |
|---------------|--------------------|---------------------------------------------------------------------------------------------------------------------------------------------------------------------------------|
| <b>1(Dy1)</b> | 0.0                | 95.1% $ \pm 15/2\rangle$                                                                                                                                                        |
|               | 125.3              | 68.0% $ \pm 13/2\rangle$ +9.5% $ \pm 11/2\rangle$ +8.7% $ \pm 9/2\rangle$ +4.9% $ \pm 7/2\rangle$                                                                               |
|               | 173.2              | 19.1% $ \pm 7/2\rangle$ +18.8% $ \pm 11/2\rangle$ +15.1% $ \pm 3/2\rangle$ +13.5% $ \pm 13/2\rangle$ +13.2% $ \pm 9/2\rangle$ +12.9% $ \pm 1/2\rangle$                          |
|               | 210.8              | 24.1% $ \pm 1/2\rangle$ +21.6% $ \pm 11/2\rangle$ +19.0% $ \pm 5/2\rangle$ +15.6% $ \pm 9/2\rangle$ +9.7% $ \pm 7/2\rangle$                                                     |
|               | 263.2              | 32.0% $ \pm 3/2\rangle$ +21.2% $ \pm 5/2\rangle$ +15.2% $ \pm 11/2\rangle$ +11.3% $ \pm 7/2\rangle$ +9.9% $ \pm 1/2\rangle$ +7.8% $ \pm 9/2\rangle$                             |
|               | 370.1              | 24.4% $ \pm 7/2\rangle$ +20.0% $ \pm 5/2\rangle$ +19.7% $ \pm 9/2\rangle$ +15.5% $ \pm 1/2\rangle$ +11.0% $ \pm 11/2\rangle$                                                    |
|               | 436.3              | 22.7% $ \pm 9/2\rangle$ +22.3% $ \pm 1/2\rangle$ +19.6% $ \pm 3/2\rangle$ +13.5% $ \pm 11/2\rangle$ +8.5% $ \pm 7/2\rangle$ +8.1% $ \pm 13/2\rangle$                            |
|               | 479.7              | 25.2% $ \pm 5/2\rangle$ +22.2% $ \pm 7/2\rangle$ +16.9% $ \pm 3/2\rangle$ +13.7% $ \pm 1/2\rangle$ +10.4% $ \pm 9/2\rangle$                                                     |
| <b>2(Dy1)</b> | 0.0                | 90.3% $ \pm 15/2\rangle$                                                                                                                                                        |
|               | 121.7              | 47.2% $ \pm 13/2\rangle$ +33.5% $ \pm 9/2\rangle$ +10.0% $ \pm 11/2\rangle$                                                                                                     |
|               | 166.8              | 24.5% $ \pm 1/2\rangle$ +21.0% $ \pm 3/2\rangle$ +16.8% $ \pm 5/2\rangle$ +15.4% $ \pm 7/2\rangle$ +14.7% $ \pm 13/2\rangle$                                                    |
|               | 198.0              | 37.0% $ \pm 7/2\rangle$ +20.7% $ \pm 11/2\rangle$ +15.5% $ \pm 5/2\rangle$ +12.5% $ \pm 1/2\rangle$ +4.3% $ \pm 13/2\rangle$                                                    |
|               | 255.2              | 37.0% $ \pm 5/2\rangle$ +33.2% $ \pm 5/2\rangle$ +11.4% $ \pm 1/2\rangle$ +7.7% $ \pm 9/2\rangle$ +5.7% $ \pm 7/2\rangle$                                                       |
|               | 345.4              | 25.5% $ \pm 9/2\rangle$ +22.5% $ \pm 11/2\rangle$ +19.6% $ \pm 7/2\rangle$ +12.3% $ \pm 13/2\rangle$ +9.6% $ \pm 5/2\rangle$                                                    |
|               | 389.3              | 30.3% $ \pm 1/2\rangle$ +22.1% $ \pm 3/2\rangle$ +14.1% $ \pm 11/2\rangle$ +10.4% $ \pm 9/2\rangle$ +8.0% $ \pm 5/2\rangle$ +7.7% $ \pm 13/2\rangle$                            |
|               | 420.8              | 17.6% $ \pm 11/2\rangle$ +16.9% $ \pm 9/2\rangle$ +16.2% $ \pm 1/2\rangle$ +13.4% $ \pm 7/2\rangle$ +12.0% $ \pm 5/2\rangle$ +11.5% $ \pm 3/2\rangle$ +10.6% $ \pm 13/2\rangle$ |
| <b>3(Dy1)</b> | 0.0                | 93.9% $ \pm 15/2\rangle$                                                                                                                                                        |
|               | 122.5              | 38.2% $ \pm 13/2\rangle$ +22.0% $ \pm 7/2\rangle$ +16.6% $ \pm 9/2\rangle$ +13.3% $ \pm 11/2\rangle$                                                                            |
|               | 171.7              | 25.3% $ \pm 11/2\rangle$ +22.5% $ \pm 13/2\rangle$ +16.6% $ \pm 5/2\rangle$ +15.5% $ \pm 7/2\rangle$ +8.9% $ \pm 9/2\rangle$                                                    |
|               | 185.2              | 34.1% $ \pm 5/2\rangle$ +15.8% $ \pm 9/2\rangle$ +15.1% $ \pm 3/2\rangle$ +13.0% $ \pm 13/2\rangle$ +11.5% $ \pm 11/2\rangle$                                                   |
|               | 232.1              | 24.5% $ \pm 3/2\rangle$ +22.6% $ \pm 1/2\rangle$ +15.1% $ \pm 9/2\rangle$ +12.6% $ \pm 7/2\rangle$ +10.5% $ \pm 5/2\rangle$ +8.0% $ \pm 11/2\rangle$                            |
|               | 255.6              | 23.0% $ \pm 3/2\rangle$ +22.8% $ \pm 7/2\rangle$ +22.4% $ \pm 9/2\rangle$ +10.6% $ \pm 5/2\rangle$ +8.0% $ \pm 1/2\rangle$ +6.6% $ \pm 13/2\rangle$                             |
|               | 283.0              | 41.5% $ \pm 1/2\rangle$ +17.0% $ \pm 11/2\rangle$ +9.2% $ \pm 5/2\rangle$ +8.8% $ \pm 13/2\rangle$ +8.8% $ \pm 7/2\rangle$ +8.8% $ \pm 3/2\rangle$                              |
|               | 329.1              | 21.1% $ \pm 3/2\rangle$ +17.8% $ \pm 1/2\rangle$ +17.4% $ \pm 11/2\rangle$ +17.2% $ \pm 5/2\rangle$ +12.4% $ \pm 9/2\rangle$ +9.4% $ \pm 7/2\rangle$                            |
| <b>3(Dy2)</b> | 0.0                | 94.0% $ \pm 15/2\rangle$                                                                                                                                                        |
|               | 107.3              | 55.4% $ \pm 13/2\rangle$ +23.5% $ \pm 11/2\rangle$ +12.8% $ \pm 9/2\rangle$                                                                                                     |
|               | 165.5              | 27.7% $ \pm 7/2\rangle$ +25.6% $ \pm 9/2\rangle$ +22.7% $ \pm 13/2\rangle$ +11.2% $ \pm 11/2\rangle$ +6.1% $ \pm 1/2\rangle$                                                    |
|               | 213.4              | 37.9% $ \pm 5/2\rangle$ +18.5% $ \pm 11/2\rangle$ +15.4% $ \pm 3/2\rangle$ +9.4% $ \pm 13/2\rangle$ +7.5% $ \pm 1/2\rangle$ +5.4% $ \pm 9/2\rangle$                             |

|  |       | $\pm 9/2\rangle$                                                                                                                                      |
|--|-------|-------------------------------------------------------------------------------------------------------------------------------------------------------|
|  | 261.6 | 28.6%  $\pm 3/2\rangle$ +20.4%  $\pm 7/2\rangle$ +20.4%  $\pm 1/2\rangle$ +13.6%  $\pm 9/2\rangle$ +7.7%  $\pm 11/2\rangle$                           |
|  | 278.2 | 26.3%  $\pm 5/2\rangle$ +23.7%  $\pm 7/2\rangle$ +16.9%  $\pm 3/2\rangle$ +11.9%  $\pm 9/2\rangle$ +10.0%  $\pm 11/2\rangle$                          |
|  | 304.2 | 46.9%  $\pm 1/2\rangle$ +19.6%  $\pm 3/2\rangle$ +12.1%  $\pm 5/2\rangle$ +9.1%  $\pm 11/2\rangle$ +5.3%  $\pm 9/2\rangle$                            |
|  | 369.3 | 24.4%  $\pm 9/2\rangle$ +17.5%  $\pm 7/2\rangle$ +15.9%  $\pm 11/2\rangle$ +15.4%  $\pm 5/2\rangle$ +14.7%  $\pm 3/2\rangle$ +10.4%  $\pm 1/2\rangle$ |

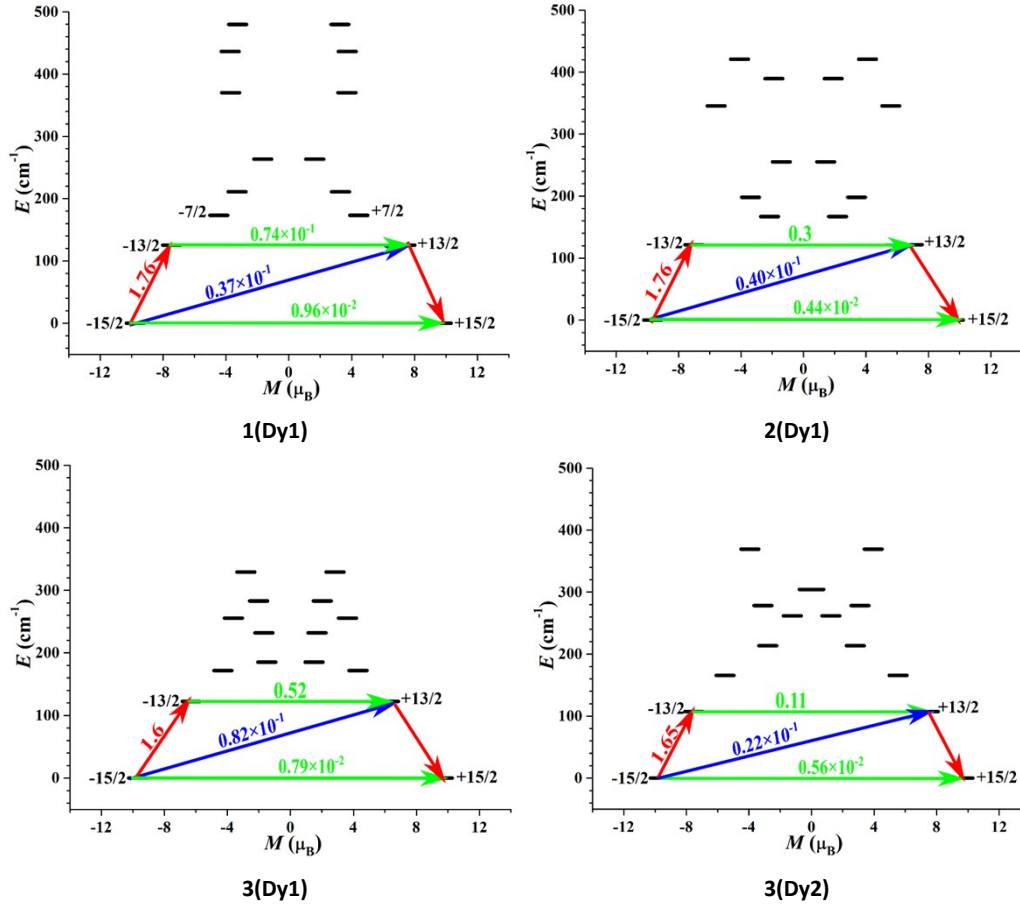

**Fig. S39.** Magnetization blocking barriers of individual Dy<sup>III</sup> fragments for 1–3. The thick black lines represent the KDs as a function of their magnetic moment along the magnetic axis. The green lines correspond to diagonal quantum tunneling of magnetization (QTM); the blue line represent off-diagonal relaxation process. The numbers at each arrow stand for the mean absolute value of the corresponding matrix element of transition magnetic moment.

To fit the exchange interactions in complexes 1–3, we took two steps to obtain it. Firstly, we calculated individual Dy<sup>III</sup> fragments using CASSCF/RASSI-SO to obtain the corresponding magnetic properties. Then, the exchange interaction between the magnetic centers was considered within the Lines model,<sup>57</sup> while the account of the dipole-dipole magnetic coupling was treated exactly. The Lines model is effective and has been successfully used widely in the research field of  $d$  and  $f$ -elements single-molecule magnets.<sup>58–59</sup>

For complexes 1–3, there is only one type of  $\tilde{J}$ . The Ising exchange Hamiltonian is:

$$\hat{H}_{\text{exch}} = -\tilde{J} \hat{S}_{Dy1}^z \hat{S}_{Dy2}^z \quad (\text{S1})$$

$\tilde{J} = 25 \cos \varphi J$ , where  $\varphi$  is the angle between the anisotropy axes on two Dy<sup>III</sup> sites, and  $J$  is the Lines exchange coupling parameter.  $\hat{S}_{Dy}^z = 1/2$  is the ground pseudospin on the Dy<sup>III</sup> site.  $\tilde{J}_{\text{total}}$  is the parameter of the total magnetic interaction ( $\tilde{J}_{\text{total}} = \tilde{J}_{\text{dip}} + \tilde{J}_{\text{exch}}$ ) between magnetic center ions. The dipolar magnetic coupling can be

calculated exactly, while the exchange coupling constant was fitted through comparison of the computed and measured magnetic susceptibilities using POLY\_ANISO program.<sup>S4-S6</sup>

**Table S16.** Exchange energies  $E$  ( $\text{cm}^{-1}$ ), the energy difference between each exchange doublets  $\Delta_t$  ( $\text{cm}^{-1}$ ) and the main values of the  $g_z$  for the lowest two exchange doublets of 1–3.

|   | 1            |                        |                        | 2          |                       |        | 3          |                        |        |
|---|--------------|------------------------|------------------------|------------|-----------------------|--------|------------|------------------------|--------|
|   | $E$          | $\Delta_t$             | $g_z$                  | $E$        | $E$                   | $g_z$  | $E$        | $\Delta_t$             | $g_z$  |
| 1 | 0.0000000000 | $1.313 \times 10^{-6}$ | $1.856 \times 10^{-9}$ | 0.00000000 | $0.92 \times 10^{-7}$ | 16.735 | 0.00000000 | $5.947 \times 10^{-7}$ | 7.425  |
|   | 00           |                        |                        | 0000       |                       |        | 00000      |                        |        |
|   | 0.0000013132 |                        |                        | 0.00000009 |                       |        | 0.00000005 |                        |        |
|   | 26           |                        | 1944                   |            | 94730                 |        |            |                        |        |
| 2 | 0.3725597440 | $1.438 \times 10^{-6}$ | 39.066                 | 0.29265746 | $0.29 \times 10^{-6}$ | 34.850 | 0.4978738  | $5.280 \times 10^{-7}$ | 38.171 |
|   | 55           |                        |                        | 4085       |                       |        | 61910      |                        |        |
|   | 0.3725611824 |                        |                        | 0.29265775 |                       |        | 0.4978743  |                        |        |
|   | 59           |                        |                        | 5781       |                       |        | 89910      |                        |        |

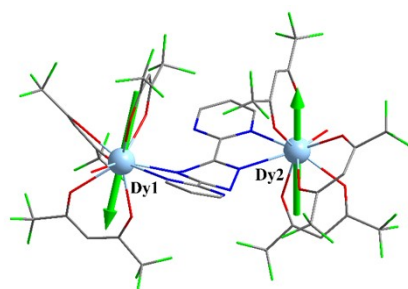

**Fig. S40.** Calculated orientations of the local main magnetic axes on  $\text{Dy}^{\text{III}}$  of complex 3.

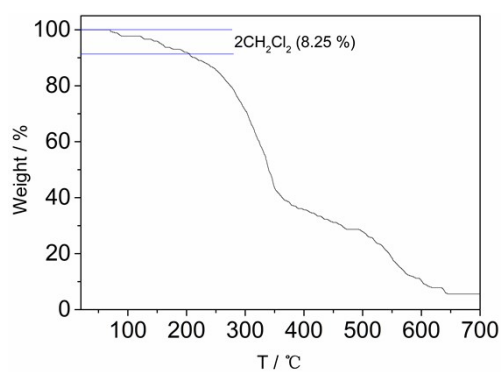

**Fig. S41.** The thermogravimetric analysis of complex 1.



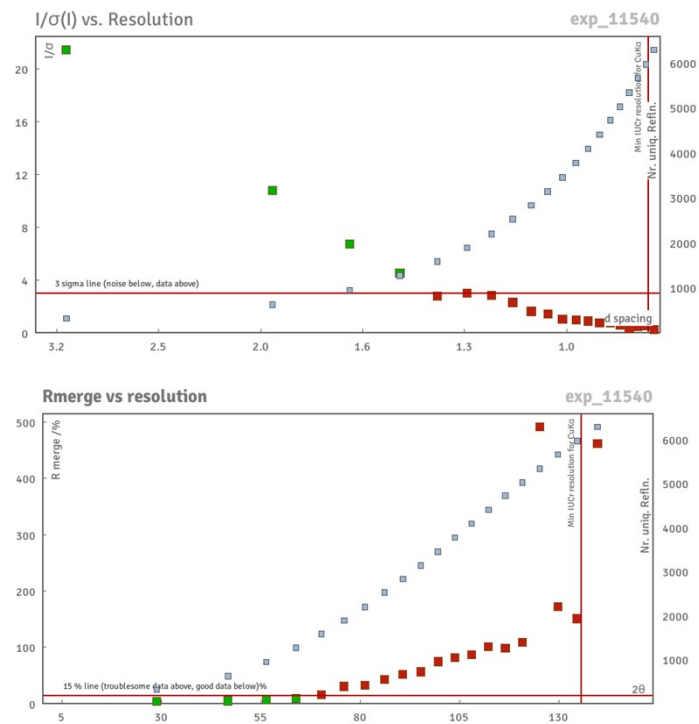

Fig. S42. The plot of  $I/\sigma$  vs resolution (top) and rmerge vs resolution (bottom) for complex 2.

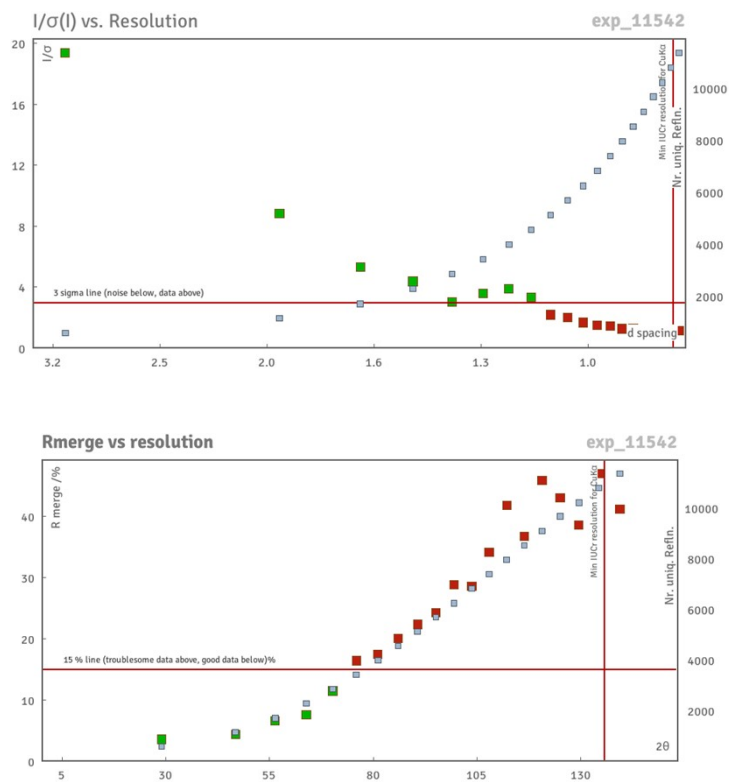

Fig. S43. The plot of  $I/\sigma$  vs resolution (top) and rmerge vs resolution (bottom) for complex 3.

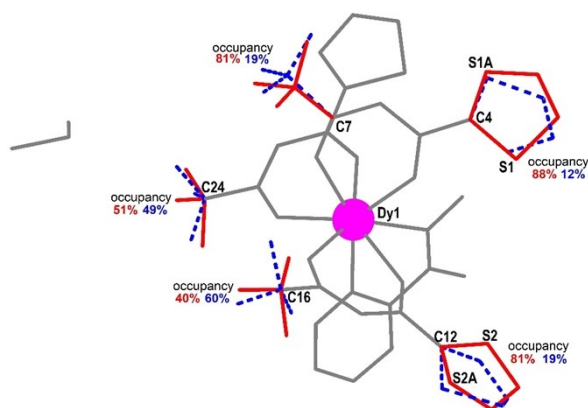

**Fig. S44.** Crystal structures of complex **1** show minor components of disordered structures. Atoms with 100% occupancy are shown in grey, and atoms with disordered structures are shown in colors (red and blue).

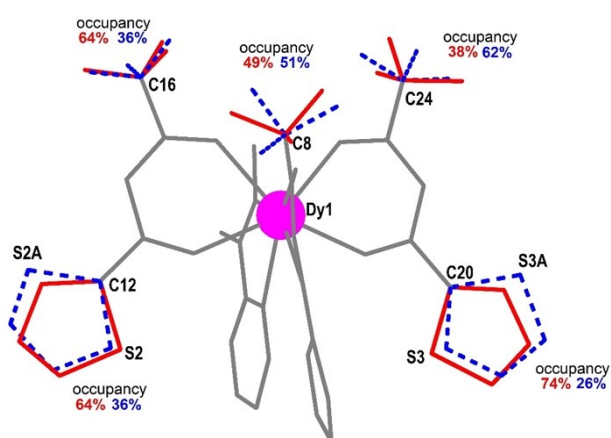

**Fig. S45.** Crystal structures of complex **2** show minor components of disordered structures. Atoms with 100% occupancy are shown in grey, and atoms with disordered structures are shown in colors (red and blue).

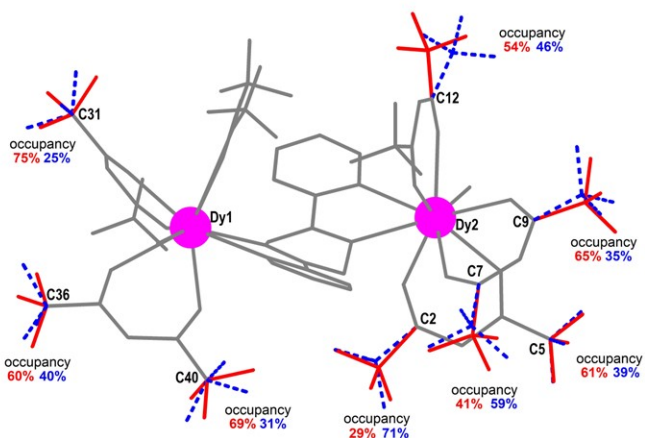

**Fig. S46.** Crystal structures of complex **3** show minor components of disordered structures. Atoms with 100% occupancy are shown in grey, and atoms with disordered structures are shown in colors (red and blue).

**Table S17** Atomic Occupancy for complex **1**.

| A tom | Occupancy | Atom | Occupancy | Atom | Occupancy |
|-------|-----------|------|-----------|------|-----------|
| S1    | 0.882(7)  | S1A  | 0.118(7)  | S2   | 0.808(7)  |

|      |          |      |          |      |          |
|------|----------|------|----------|------|----------|
| S2A  | 0.192(7) | F1   | 0.81(4)  | F1A  | 0.19(4)  |
| F2   | 0.81(4)  | F2A  | 0.19(4)  | F3   | 0.81(4)  |
| F3A  | 0.19(4)  | F4   | 0.40(5)  | F4A  | 0.60(5)  |
| F5   | 0.40(5)  | F5A  | 0.60(5)  | F6   | 0.40(5)  |
| F6A  | 0.60(5)  | F7   | 0.51(4)  | F7A  | 0.49(4)  |
| F8   | 0.51(4)  | F8A  | 0.49(4)  | F9   | 0.51(4)  |
| F9A  | 0.49(4)  | C1   | 0.882(7) | H1   | 0.882(7) |
| C1A  | 0.118(7) | H1A  | 0.118(7) | C2   | 0.882(7) |
| H2   | 0.882(7) | C2A  | 0.118(7) | H2A  | 0.118(7) |
| C3   | 0.882(7) | H3   | 0.882(7) | C3A  | 0.118(7) |
| H3A  | 0.118(7) | C8A  | 0.19(4)  | C8   | 0.81(4)  |
| C9   | 0.808(7) | H9   | 0.808(7) | C9A  | 0.192(7) |
| H9A  | 0.192(7) | C10  | 0.808(7) | H10  | 0.808(7) |
| C10A | 0.192(7) | H10A | 0.192(7) | C11  | 0.808(7) |
| H11  | 0.808(7) | C11A | 0.192(7) | H11A | 0.192(7) |

**Table S18** Atomic Occupancy for complex 2.

| Atom | Occupancy | Atom | Occupancy | Atom | Occupancy |
|------|-----------|------|-----------|------|-----------|
| S2   | 0.639(15) | S3   | 0.737(14) | F1   | 0.49(5)   |
| F2   | 0.49(5)   | F3   | 0.49(5)   | F4   | 0.64(2)   |
| F5   | 0.64(2)   | F6   | 0.64(2)   | F7   | 0.38(3)   |
| F8   | 0.38(3)   | F9   | 0.38(3)   | C9   | 0.639(15) |
| H9   | 0.639(15) | C10  | 0.639(15) | H10  | 0.639(15) |
| C11  | 0.639(15) | H11  | 0.639(15) | C17  | 0.737(14) |
| H17  | 0.737(14) | C18  | 0.737(14) | H18  | 0.737(14) |
| C19  | 0.737(14) | H19  | 0.737(14) | S3A  | 0.263(14) |
| C19A | 0.263(14) | H19A | 0.263(14) | C18A | 0.263(14) |
| H18A | 0.263(14) | C17A | 0.263(14) | H17A | 0.263(14) |
| S2A  | 0.361(15) | C11A | 0.361(15) | H11A | 0.361(15) |
| C10A | 0.361(15) | H10A | 0.361(15) | C9A  | 0.361(15) |
| H9A  | 0.361(15) | F3A  | 0.51(5)   | F2A  | 0.51(5)   |
| F1A  | 0.51(5)   | F8A  | 0.62(3)   | F7A  | 0.62(3)   |
| F9A  | 0.62(3)   | F6A  | 0.36(2)   | F5A  | 0.36(2)   |
| F4A  | 0.36(2)   |      |           |      |           |

**Table S19** Atomic Occupancy for complex 3.

| Atom | Occupancy | Atom | Occupancy | Atom | Occupancy |
|------|-----------|------|-----------|------|-----------|
|------|-----------|------|-----------|------|-----------|

|      |           |      |           |      |           |
|------|-----------|------|-----------|------|-----------|
| F1   | 0.286(12) | F2   | 0.286(12) | F3   | 0.286(12) |
| F4   | 0.614(12) | F5   | 0.614(12) | F6   | 0.614(12) |
| F7   | 0.410(14) | F8   | 0.410(14) | F9   | 0.410(14) |
| F10  | 0.653(19) | F11  | 0.653(19) | F12  | 0.653(19) |
| F16  | 0.535(17) | F17  | 0.535(17) | F18  | 0.535(17) |
| F25  | 0.753(14) | F26  | 0.753(14) | F27  | 0.753(14) |
| F31  | 0.596(13) | F32  | 0.596(13) | F33  | 0.596(13) |
| F34  | 0.694(13) | F35  | 0.694(13) | F36  | 0.694(13) |
| C1   | 0.286(12) | C6   | 0.410(14) | C10  | 0.653(19) |
| C11  | 0.535(17) | C6A  | 0.590(14) | F8A  | 0.590(14) |
| F7A  | 0.590(14) | F9A  | 0.590(14) | C11A | 0.465(17) |
| F18A | 0.465(17) | F16A | 0.465(17) | F17A | 0.465(17) |
| C1A  | 0.714(12) | F1A  | 0.714(12) | F2A  | 0.714(12) |
| F3A  | 0.714(12) | F4A  | 0.386(12) | F6A  | 0.386(12) |
| F5A  | 0.386(12) | F33A | 0.404(13) | F31A | 0.404(13) |
| F32A | 0.404(13) | F36A | 0.306(13) | F34A | 0.306(13) |
| F35A | 0.306(13) | F10A | 0.347(19) | C10A | 0.347(19) |
| F11A | 0.347(19) | F12A | 0.347(19) | F27A | 0.247(14) |
| F25A | 0.247(14) | F26A | 0.247(14) |      |           |

#### References:

- S1 Galván, I. F.; Vacher, M.; Alavi, A.; Angeli, C.; Aquilante, F.; Autschbach, J.; Bao, J. J.; Bokarev, S. I.; Bogdanov, N. A.; Carlson, R. K.; Chibotaru, L. F.; Creutzberg, J.; Dattani, N.; Delcey, M. G.; Dong, S. S.; Dreuw, A.; Freitag, L.; Frutos, L. M.; Gagliardi, L.; Gendron, F.; Giussani, A.; González, L.; Grell, G.; Guo, M. Y.; Hoyer, C. E.; Johansson, M.; Keller, S.; Knecht, S.; Kovacevic, G.; Källman, E.; Manni, G. L.; Lundberg, M.; Ma, Y. J.; Mai, S.; Malhado, J. P.; Malmqvist, P. Å.; Marquetand, P.; Mewes, S. A.; Norell, J.; Olivucci, M.; Oppel, M.; Phung, Q. M.; Pierloot, K.; Plasser, F.; Reiher, M.; Sand, A. M.; Schapiro, I.; Sharma, P.; Stein, C. J.; Sørensen, L. K.; Truhlar, D. G.; Ugandi, M.; Ungur, L.; Valentini, A.; Vancoillie, S.; Veryazov, V.; Weser, O.; Wesolowski, T. A.; Widmark, Per-Olof.; Wouters, S.; Zech, A.; Zobel, J. P.; Lindh. R. *J. Chem. Theory Comput.* **2019**, *15*, 5925–5964.
- S2 Malmqvist, P. Å.; Roos, B. O.; Schimmelpfennig, B. *Chem. Phys. Lett.*, **2002**, *357*, 230–240.
- S3 Heß, B. A.; Marian, C. M.; Wahlgren, U.; Gropen, O. *Chem. Phys. Lett.*, **1996**, *251*, 365–371.
- S4 Chibotaru, L. F.; Ungur, L.; Soncini, A. *Angew. Chem., Int. Ed.* **2008**, *47*, 4126–4129.
- S5 Ungur, L.; Van den Heuvel, W.; Chibotaru, L. F. *New J. Chem.* **2009**, *33*, 1224–1230.
- S6 Chibotaru, L. F.; Ungur, L.; Aronica, C.; Elmoll, H.; Pilet, G.; Luneau, D. *J. Am. Chem. Soc.* **2008**, *130*, 12445–12455. Aquilante, F.; Autschbach, J.; Carlson, R. K.; Chibotaru, L. F.; Delcey, M. G.; De Vico, L.; Galván, I. F.; Ferré, N.; Frutos, L. M.; Gagliardi, L.; Garavelli, M.; Giussani, A.; Hoyer, C. E.; Li Manni, G.; Lischka, H.; Ma, D.; Malmqvist, P. Å.; Müller, T.; Nenov, A.; Olivucci, M.; Pedersen, T. B.; Peng, D.; Plasser, F.; Pritchard, B.;

Reiher, M.; Rivalta, I.; Schapiro, I.; Segarra-Martí, J.; Stenrup, M.; Truhlar, D. G.; Ungur, L.; Valentini, A.; Vancoillie, S.; Veryazov, V.; Vysotskiy, V. P.; Weingart, O.; Zapata, F.; Lindh, R. *J. Comput. Chem.* **2016**, *37*, 506–541.

S7 Lines, M. E. *J. Chem. Phys.* **1971**, *55*, 2977–2984.

S8 Mondal, K. C.; Sundt, A.; Lan, Y. H.; Kostakis, G. E.; Waldmann, O.; Ungur, L.; Chibotaru, L. F.; Anson, C. E.; Powell, A. K. *Angew. Chem., Int. Ed.* **2012**, *51*, 7550–7554.

S9 Langle, S. K.; Wielechowski, D. P.; Vieru, V.; Chilton, N. F.; Moubaraki, B.; Abrahams, B. F.; Chibotaru, L. F.; Murray, K. S. *Angew. Chem., Int. Ed.* **2013**, *52*, 12014–12019.
